# Supplementary material for: A Genome Scan for Positive Selection in Thoroughbred Horses
Source: PLoS One. 2009 Jun 2;4(6):e5767. doi: 10.1371/journal.pone.0005767 (PMC2685479; doi:10.1371/journal.pone.0005767)
Supplement: Table S2 — Full list of gene ontologies overrepresented in selected regions (1). The on-line functional annotation bioinformatics tool DAVID (david.abcc.ncifcrf.gov) was used to search for gene ontology (GO) terms that were overrepresented among genes in selected regions. Selected regions were defined by deviation from expected heterozygosity (Ewen-Watterson test) in Thoroughbred and included the four high FST regions that had highly significant (P<0.01) reductions in Thoroughbred heterozygosity. The table shows the GO category (BP: Biological process; MF: Molecular function; CC: Cellular compartment; and KEGG pathway), GO functional term (Term), number of genes in each GO category (Count), proportion of the total number of genes in list in that GO category (%), significance of over-representation (P-value), the names of genes within each GO category (Genes), the total number of genes in the selected regions list (List total), the number of genes with GO term in the database (Pop hits), the total number of genes in the database (Pop total) and the fold enrichment (Fold change). (0.13 MB XLS) [file pone.0005767.s002.xls]

## Sheet: Sheet1
Category	Term	Count	%	PValue	Genes	List Total	Pop Hits	Pop Total	Fold Change
GOTERM_BP_ALL	GO:0007275~multicellular organismal development	123	0.1608	0.000232033	CELSR1, FOXJ1, LECT1, ITGA4, SALL4, COL1A2, TAGLN3, USH1G, GALR2, ITGA3, HOXD12, CDK5RAP3, PPARA, MEF2B, EVPL, CDK6, NCKAP1, IGFBP4, CSF2, NLE1, CA10, LIG3, SPATA2, EMCN, APBB2, SGCB, TSHZ2, UNC45B, ERBB2, STRBP, SPATA18, CCL2, ITGB4, HOXD13, TBX4, TBX2, sox9, MAB21L1, ITM2B, LHX6, ZAR1, HOXD1, HOXB1, GAP43, FOXF1, HOXB7, FOXL1, KIAA1715, ITGAV, ALG5, LHX1, ACCN1, POSTN, BMP7, ASAH1, CRISPLD2, HO…	592	2349	15360	1.3586
GOTERM_BP_ALL	GO:0032502~developmental process	162	0.2118	0.000238207	CELSR1, FOXJ1, SOCS3, STEAP4, TNFSF8, PTGS1, LECT1, ITGA4, MMD, DNAI2, SALL4, CDC42EP4, COL1A2, ROD1, C5, TAGLN3, USH1G, GALR2, ITGA3, HOXD12, CDK5RAP3, PPARA, DBC1, MEF2B, NDUFA13, EVPL, CDK6, NCKAP1, IGFBP4, CSF2, NLE1, CA10, LIG3, GLRX2, SPATA2, EMCN, APBB2, SGCB, NFKB1, TSHZ2, UNC45B, UBE2Z, ERBB2, STRBP, SPATA18, CCL2, BIRC5, ITGB4, PAPPA, HOXD13, TBX4, TNS4, RFFL, TBX2, sox9, MAB21L1, CHAD,…	592	3262	15360	1.28855
GOTERM_BP_ALL	GO:0046907~intracellular transport	47	0.0614	0.000430255	STEAP2, PEX1, UCHL1, DYNC1I1, PEX12, TOB1, COPE, APBB2, KPNA3, RPL23, SLC25A30, MTX2, STARD3, SPG7, COPZ2, UPF1, STXBP4, GNAS, TUBD1, KPNB1, APPBP2, KIF19, ATP7B, NPEPL1, AP2B1, MRPL45, STX16, RFFL, AP1GBP1, SLC25A15, TUBB3, TUBB1, GGA3, KIF2B, PPP3CA, NDUFA13, RAB14, KIF12, BET1, NBEA, HOMER3, COG1, COG3, IPO11, NUP35, CLTC, RAE1,	592	714	15360	1.70793
GOTERM_BP_ALL	GO:0009987~cellular process	527	0.6889	0.000731785	CELSR1, OR1L3, DDIT4L, SLC25A30, PNPO, CDC73, ZNF652, MTTP, CDK3, TMPRSS7, CPB2, MRRF, NEK3, RGS13, PTPN1, MRPL27, HOXD12, RFXANK, TUBB1, SETDB2, MRPL10, RASL10B, CDH15, CDK6, IPO11, ZNFX1, MMP28, GNG10, EMCN, RGS2, SGCB, TSHZ2, UNC45B, MVD, GDPD1, FBXO31, RPL7A, ABHD10, BIRC5, NEK7, ZNHIT3, MRPS7, TBX2, TTLL6, TTLL11, CHAD, GAP43, MANBA, TXK, HOXB1, HOXB7, FOXF1, ITGAV, ALG5, KIAA0368, SF4, COX1…	592	12970	15360	1.05424
GOTERM_BP_ALL	GO:0048015~phosphoinositide-mediated signaling	13	0.017	0.000765683	CALCR, MC3R, CERK, DGKE, GAP43, DGKH, ERBB2, SPHK1, CERKL, PIK3C3, HTR2A, AURKA, EDG2,	592	106	15360	3.18205
GOTERM_BP_ALL	GO:0051649~establishment of cellular localization	54	0.0706	0.000793784	STEAP2, PEX1, UCHL1, DYNC1I1, EXOC7, COPE, RPL23, SLC25A30, MTX2, STARD3, COPZ2, UPF1, STXBP4, HTR2A, APPBP2, ATP7B, MRPL45, STX16, UNC13D, SLC25A15, TUBB1, PPP3CA, NDUFA13, IPO11, CLTC, TOB1, PEX12, KPNA3, APBB2, SPG7, ARFGEF1, TUBD1, GNAS, CCL5, KPNB1, KIF19, NPEPL1, BIRC5, AP2B1, RFFL, AP1GBP1, SYT4, TUBB3, KIF2B, GGA3, KIF12, RAB14, BET1, NBEA, COG3, COG1, HOMER3, NUP35, RAE1,	592	881	15360	1.59033
GOTERM_BP_ALL	GO:0051641~cellular localization	54	0.0706	0.00151124	STEAP2, PEX1, UCHL1, DYNC1I1, EXOC7, COPE, RPL23, SLC25A30, MTX2, STARD3, COPZ2, UPF1, STXBP4, HTR2A, APPBP2, ATP7B, MRPL45, STX16, UNC13D, SLC25A15, TUBB1, PPP3CA, NDUFA13, IPO11, CLTC, TOB1, PEX12, KPNA3, APBB2, SPG7, ARFGEF1, TUBD1, GNAS, CCL5, KPNB1, KIF19, NPEPL1, BIRC5, AP2B1, RFFL, AP1GBP1, SYT4, TUBB3, KIF2B, GGA3, KIF12, RAB14, BET1, NBEA, COG3, COG1, HOMER3, NUP35, RAE1,	592	906	15360	1.54645
GOTERM_BP_ALL	GO:0008286~insulin receptor signaling pathway	7	0.0092	0.0023009	FOXO1A, SOCS3, STXBP4, PTPN1, PIK3R1, SOCS7, GRB2,	592	36	15360	5.04505
GOTERM_BP_ALL	GO:0007200~G-protein signaling, coupled to IP3 second messenger (phospholipase C activating)	10	0.0131	0.00272717	CALCR, GAP43, DGKH, SPHK1, MC3R, CERK, DGKE, CERKL, HTR2A, EDG2,	592	77	15360	3.3696
GOTERM_BP_ALL	GO:0048856~anatomical structure development	108	0.1412	0.00274462	CELSR1, FOXJ1, SOCS3, LECT1, ITGA4, DNAI2, CDC42EP4, SALL4, COL1A2, ROD1, TAGLN3, USH1G, GALR2, ITGA3, HOXD12, CDK5RAP3, PPARA, MEF2B, EVPL, NDUFA13, CDK6, NCKAP1, CSF2, IGFBP4, NLE1, CA10, LIG3, EMCN, SGCB, APBB2, UNC45B, ERBB2, CCL2, HOXD13, TBX4, TBX2, sox9, CHAD, MAB21L1, ITM2B, LHX6, GAP43, FOXF1, ITGAV, LHX1, ACCN1, POSTN, BMP7, ASAH1, CRISPLD2, HOXB5, TLR4, UCHL1, C1GALT1, NEUROD1, MUSK, C…	592	2153	15360	1.30152
GOTERM_BP_ALL	GO:0051329~interphase of mitotic cell cycle	11	0.0144	0.00279002	RB1, BIRC5, CDK10, PPP3CA, GTSE1, PPM1D, CDK6, APBB2, CDT1, CDC6, CCNB1,	592	92	15360	3.10223
GOTERM_BP_ALL	GO:0022403~cell cycle phase	26	0.034	0.00285632	LIG3, CDK10, SUGT1, CCNA1, GTSE1, APBB2, ASPM, CDK3, UTP14C, AURKA, SPO11, CCNB1, BIRC5, NEK3, PPM1D, CDT1, CDC6, TUBB3, RB1, KIF2B, PPP3CA, CDK6, PPP1R9B, CCDC16, RAD51L3, CDC26,	592	356	15360	1.89493
GOTERM_BP_ALL	GO:0007049~cell cycle	52	0.068	0.0030874	CDK10, GTSE1, CTCFL, CDC73, ASPM, UPF1, CDK3, SPHK1, UTP14C, SPO11, CCNB1, GAS2L2, NEK3, MYBL1, SEPT4, TADA2L, CDK7, PPM1D, CDK5RAP3, CDT1, MTUS1, ERBB2IP, BRIP1, DBC1, RB1, PPP3CA, CDK6, PPP1R9B, CCDC16, RAD51L3, PHB, LIG3, SUGT1, CCNA1, RGS2, APBB2, PARD6B, LLGL2, RABGAP1, AURKA, BIRC5, DAB2IP, STARD13, CDC6, TUBB3, CKAP2, TNFSF15, KIF2B, COPS5, BMP7, CDC26, RCBTB1,	592	894	15360	1.50916
GOTERM_BP_ALL	GO:0007205~protein kinase C activation	6	0.0078	0.00331275	GAP43, DGKH, SPHK1, CERK, DGKE, CERKL,	592	27	15360	5.76577
GOTERM_BP_ALL	GO:0006610~ribosomal protein import into nucleus	3	0.0039	0.00432074	KPNB1, RPL23, IPO11,	592	3	15360	25.9459
GOTERM_BP_ALL	GO:0051325~interphase	11	0.0144	0.00441733	RB1, BIRC5, CDK10, PPP3CA, GTSE1, PPM1D, CDK6, APBB2, CDT1, CDC6, CCNB1,	592	98	15360	2.9123
GOTERM_BP_ALL	GO:0000041~transition metal ion transport	9	0.0118	0.00443891	STEAP2, SLC39A11, STEAP4, SLC31A2, SLC30A9, SLC39A8, SLC30A5, SLC31A1, ATP7B,	592	68	15360	3.43402
GOTERM_BP_ALL	GO:0006812~cation transport	35	0.0458	0.0048523	ATP6V1A, STEAP2, STEAP4, KCTD2, BSPRY, TRPC4, ATP9A, ATP6V1G1, SLC9A10, KCNB1, CACNB1, SLC31A1, HTR2A, ATP13A1, KCNRG, ATP7B, SLC9A8, SLC39A11, SLC31A2, CNGA1, SLC30A9, ATP5H, SLC39A8, SLC10A4, ARMC1, KCNT2, ATP10D, PPP3CA, ATP8A1, CACNA1G, ACCN1, SLC30A5, KCTD4, KCNG1, ATP5G1,	592	552	15360	1.64512
GOTERM_BP_ALL	GO:0007283~spermatogenesis	18	0.0235	0.00506495	FOXJ1, LIG3, CNGA1, MYCBPAP, SPATA2, CCNA1, C17orf47, CCT6B, ACOX1, SLC9A10, UTP14C, SPAG9, TUBD1, STRBP, SPATA18, ZNF313, SPATA20, SPO11,	592	220	15360	2.12285
GOTERM_BP_ALL	GO:0048232~male gamete generation	18	0.0235	0.00506495	FOXJ1, LIG3, CNGA1, MYCBPAP, SPATA2, CCNA1, C17orf47, CCT6B, ACOX1, SLC9A10, UTP14C, SPAG9, TUBD1, STRBP, SPATA18, ZNF313, SPATA20, SPO11,	592	220	15360	2.12285
GOTERM_BP_ALL	GO:0000278~mitotic cell cycle	23	0.0301	0.00591432	NEK3, BIRC5, CDK10, SUGT1, CCNA1, GTSE1, PPM1D, APBB2, CDT1, CDC6, TUBB3, RB1, ASPM, PPP3CA, KIF2B, SPHK1, CDK3, CDK6, PPP1R9B, CCDC16, CDC26, AURKA, CCNB1,	592	318	15360	1.87659
GOTERM_BP_ALL	GO:0007346~regulation of progression through mitotic cell cycle	6	0.0078	0.00705703	BIRC5, CDK10, SPHK1, APBB2, CDT1, CDC6,	592	32	15360	4.86486
GOTERM_BP_ALL	GO:0001501~skeletal development	18	0.0235	0.00718112	CALCR, SNAI1, DLX3, HOXD13, TOB1, TBX4, LECT1, DLX5, HOXD12, HOXD10, sox9, DLX6, COL1A2, CDK6, POSTN, IGFBP4, PRKRA, BMP7,	592	228	15360	2.04836
GOTERM_BP_ALL	GO:0045859~regulation of protein kinase activity	18	0.0235	0.00780985	CCNA1, CDK7, RGS3, CERK, MAP2K1IP1, CDK5RAP3, DGKE, CDC6, GAP43, RB1, TNFSF15, DGKH, ERBB2, SPHK1, DUSP19, C5, CERKL, HTR2A,	592	230	15360	2.03055
GOTERM_BP_ALL	GO:0048513~organ development	67	0.0876	0.00888084	CELSR1, TLR4, LECT1, C1GALT1, ITGA4, NEUROD1, SALL4, MUSK, SPHK1, DLX6, COL1A2, PRKRA, TAGLN3, USH1G, CDK5RAP2, HOXD12, PIK3R1, CDK5RAP3, PPARA, HOXB13, MEF2B, RB1, EVPL, BOC, CDK6, IGFBP4, CSF2, SGCE, CALCR, SNAI1, CA10, IL17C, EMCN, TOB1, DLX5, SGCB, C17orf47, PLXDC1, HOXB3, UNC45B, TNC, ERBB2, NGFR, SGCA, ARX, CCL2, SRI, IRF8, DLX3, HOXD13, TBX4, TBX2, HOXD10, HOXD3, sox9, LHX6, CRB1, FOXO1A, …	592	1282	15360	1.35599
GOTERM_BP_ALL	GO:0032147~activation of protein kinase activity	8	0.0105	0.00948434	GAP43, TNFSF15, DGKH, SPHK1, MAP2K1IP1, CERK, DGKE, CERKL,	592	62	15360	3.34786
GOTERM_BP_ALL	GO:0043549~regulation of kinase activity	18	0.0235	0.00995589	CCNA1, CDK7, RGS3, CERK, MAP2K1IP1, CDK5RAP3, DGKE, CDC6, GAP43, RB1, TNFSF15, DGKH, ERBB2, SPHK1, DUSP19, C5, CERKL, HTR2A,	592	236	15360	1.97893
GOTERM_BP_ALL	GO:0007276~gamete generation	20	0.0261	0.0102916	FOXJ1, LIG3, CNGA1, MYCBPAP, SPATA2, CCNA1, C17orf47, CCT6B, RPS6KB1, ACOX1, BRUNOL4, SLC9A10, UTP14C, SPAG9, TUBD1, STRBP, SPATA18, ZNF313, SPATA20, SPO11,	592	275	15360	1.88698
GOTERM_BP_ALL	GO:0051338~regulation of transferase activity	18	0.0235	0.0120964	CCNA1, CDK7, RGS3, CERK, MAP2K1IP1, CDK5RAP3, DGKE, CDC6, GAP43, RB1, TNFSF15, DGKH, ERBB2, SPHK1, DUSP19, C5, CERKL, HTR2A,	592	241	15360	1.93787
GOTERM_BP_ALL	GO:0022402~cell cycle process	42	0.0549	0.014778	PHB, CDK10, LIG3, SUGT1, CCNA1, GTSE1, APBB2, CTCFL, CDC73, ASPM, SPHK1, CDK3, UTP14C, SPO11, AURKA, GAS2L2, CCNB1, BIRC5, NEK3, TADA2L, CDK7, DAB2IP, PPM1D, CDT1, CDK5RAP3, STARD13, MTUS1, CDC6, TUBB3, DBC1, BRIP1, RB1, TNFSF15, KIF2B, PPP3CA, CDK6, PPP1R9B, CCDC16, COPS5, RAD51L3, BMP7, CDC26,	592	749	15360	1.45491
GOTERM_BP_ALL	GO:0000279~M phase	20	0.0261	0.0154606	NEK3, BIRC5, LIG3, SUGT1, CCNA1, GTSE1, CDC6, TUBB3, RB1, ASPM, KIF2B, CDK3, UTP14C, PPP1R9B, CCDC16, RAD51L3, CDC26, SPO11, AURKA, CCNB1,	592	287	15360	1.80808
GOTERM_BP_ALL	GO:0033036~macromolecule localization	46	0.0601	0.0154708	CELSR1, RAB22A, PEX1, SNX30, EXOC7, PEX12, TOB1, COPE, SNX11, KPNA3, RPL23, MTX2, COPZ2, ATG3, VPS36, UPF1, STXBP4, GNAS, KPNB1, VPS37A, CASC3, APPBP2, SNF8, NPEPL1, BIRC5, AP2B1, MRPL45, STX16, RFFL, AP1GBP1, ERBB2IP, GGA3, PPP3CA, NDUFA13, RAB14, BET1, COG6, NBEA, HOMER3, COG3, COG1, IPO11, NUP35, CLTC, RAE1, RAB37,	592	840	15360	1.42085
GOTERM_BP_ALL	GO:0019932~second-messenger-mediated signaling	18	0.0235	0.0156673	CCL2, CALCR, MC3R, GALR2, CERK, DGKE, SSTR2, TUBB3, GAP43, DGKH, ERBB2, SPHK1, GNAS, CERKL, PIK3C3, HTR2A, AURKA, EDG2,	592	248	15360	1.88317
GOTERM_BP_ALL	GO:0048731~system development	86	0.1124	0.0158582	CELSR1, TLR4, UCHL1, LECT1, C1GALT1, ITGA4, NEUROD1, SALL4, MUSK, SPHK1, NEUROD2, DLX6, COL1A2, PRKRA, TAGLN3, USH1G, CDK5RAP2, LSAMP, GALR2, ITGA3, CDK5RAP3, HOXD12, PIK3R1, PPARA, PPP1R9A, HOXB13, MEF2B, RB1, EVPL, BOC, RAPGEFL1, CDK6, PPP1R9B, NCKAP1, IGFBP4, CSF2, SGCE, CALCR, SNAI1, CA10, LIG3, IL17C, EMCN, TOB1, DLX5, APBB2, SGCB, ADAM22, C17orf47, PLXDC1, SPG7, HOXB3, PARD6B, UNC45B, TNC, …	592	1760	15360	1.26781
GOTERM_BP_ALL	GO:0019953~sexual reproduction	22	0.0288	0.0159798	SPACA3, FOXJ1, LIG3, MYCBPAP, CNGA1, SPATA2, CCNA1, C17orf47, CCT6B, RPS6KB1, ACOX1, BRUNOL4, SLC9A10, UTP14C, SPAG9, TUBD1, STRBP, SPATA18, ZNF313, ZPBP2, SPATA20, SPO11,	592	328	15360	1.74028
GOTERM_BP_ALL	GO:0030154~cell differentiation	89	0.1163	0.0165884	TLR4, HOXB5, SOCS3, STEAP4, MYCBPAP, TNFSF8, UCHL1, PTGS1, LECT1, C1GALT1, MMD, NEUROD1, SGK3, SPHK1, NEUROD2, UTP14C, FZD1, PTGIS, C5, PRKRA, TFAP2C, HTR2A, SEPT4, USH1G, CDK5RAP2, GALR2, ITGA3, PIK3R1, CDK5RAP3, PPP1R9A, SOCS7, DBC1, RB1, RPS6KB1, NDUFA13, EVPL, BOC, CDK6, NCKAP1, PPP1R9B, ZNF313, CSF2, NLE1, AATF, SAP30BP, PHB, GLRX2, IL17C, SPATA2, TOB1, DLX5, APBB2, NFKB1, C17orf47, PARD6B, …	592	1835	15360	1.25841
GOTERM_BP_ALL	GO:0048869~cellular developmental process	89	0.1163	0.0165884	TLR4, HOXB5, SOCS3, STEAP4, MYCBPAP, TNFSF8, UCHL1, PTGS1, LECT1, C1GALT1, MMD, NEUROD1, SGK3, SPHK1, NEUROD2, UTP14C, FZD1, PTGIS, C5, PRKRA, TFAP2C, HTR2A, SEPT4, USH1G, CDK5RAP2, GALR2, ITGA3, PIK3R1, CDK5RAP3, PPP1R9A, SOCS7, DBC1, RB1, RPS6KB1, NDUFA13, EVPL, BOC, CDK6, NCKAP1, PPP1R9B, ZNF313, CSF2, NLE1, AATF, SAP30BP, PHB, GLRX2, IL17C, SPATA2, TOB1, DLX5, APBB2, NFKB1, C17orf47, PARD6B, …	592	1835	15360	1.25841
GOTERM_BP_ALL	GO:0015031~protein transport	39	0.051	0.0195994	RAB22A, PEX1, SNX30, EXOC7, PEX12, COPE, TOB1, SNX11, KPNA3, RPL23, MTX2, COPZ2, ATG3, VPS36, STXBP4, GNAS, KPNB1, VPS37A, APPBP2, SNF8, NPEPL1, AP2B1, MRPL45, STX16, RFFL, AP1GBP1, GGA3, PPP3CA, NDUFA13, RAB14, BET1, COG6, HOMER3, COG3, COG1, IPO11, NUP35, CLTC, RAB37,	592	697	15360	1.45178
GOTERM_BP_ALL	GO:0006810~transport	124	0.1621	0.0211511	STEAP4, SNX30, PCTP, SNX11, SLC25A30, ATP6V1G1, STARD3, GABRG1, MTTP, UPF1, COL1A2, SLC7A5, CACNB1, SLC31A1, ATP7B, SLC9A8, SLC31A2, SLC16A5, PPARA, UNC13D, TUBB1, SLC25A13, CYGB, GABRA4, NDUFA13, IPO11, RAB37, ATP5G1, KCTD2, BSPRY, GLRX2, ABCC3, OSBPL7, APBB2, ARFGEF1, GNAS, CASC3, KIF19, SNF8, NPEPL1, SLC39A11, AP2B1, RFFL, SYT4, ARMC1, SEC14L1, GGA3, ATP8A1, KIF12, ACCN1, BET1, COG1, SLC35B1, …	592	2697	15360	1.19292
GOTERM_BP_ALL	GO:0008104~protein localization	43	0.0562	0.0213982	CELSR1, RAB22A, PEX1, SNX30, EXOC7, PEX12, TOB1, COPE, SNX11, KPNA3, RPL23, MTX2, COPZ2, ATG3, VPS36, STXBP4, GNAS, KPNB1, VPS37A, APPBP2, SNF8, NPEPL1, BIRC5, AP2B1, MRPL45, STX16, RFFL, AP1GBP1, ERBB2IP, GGA3, PPP3CA, NDUFA13, RAB14, BET1, COG6, NBEA, HOMER3, COG3, COG1, IPO11, NUP35, CLTC, RAB37,	592	790	15360	1.41225
GOTERM_BP_ALL	GO:0030001~metal ion transport	27	0.0353	0.0219251	STEAP2, STEAP4, KCTD2, BSPRY, TRPC4, KCNB1, SLC9A10, CACNB1, SLC31A1, HTR2A, KCNRG, ATP7B, SLC39A11, SLC9A8, SLC31A2, CNGA1, SLC30A9, SLC39A8, SLC10A4, KCNT2, ARMC1, PPP3CA, ACCN1, CACNA1G, SLC30A5, KCTD4, KCNG1,	592	443	15360	1.58136
GOTERM_BP_ALL	GO:0009968~negative regulation of signal transduction	10	0.0131	0.0233639	DDIT4L, SOCS3, RGS13, TOB1, LECT1, RGS3, RGS2, SOCS7, RGS18, RGS21,	592	108	15360	2.4024
GOTERM_BP_ALL	GO:0006415~translational termination	3	0.0039	0.0272919	UPF1, ICT1, MTRF1,	592	7	15360	11.1197
GOTERM_BP_ALL	GO:0032501~multicellular organismal process	166	0.217	0.0277665	CELSR1, OR1L3, FOXJ1, PTGS1, LECT1, OR1L1, ITGA4, SSTR2, SALL4, GABRG1, COL1A2, C5, CACNB1, ATP7B, TAGLN3, USH1G, OR1J2, GALR2, ITGA3, HOXD12, CDK5RAP3, PPARA, DFNB31, MEF2B, PPP1R1B, EVPL, CDK6, NCKAP1, IGFBP4, CSF2, NLE1, OR2K2, CA10, LIG3, CA4, F13B, SPATA2, EMCN, APBB2, SGCB, NFKB1, TSHZ2, PDCL, UNC45B, ERBB2, GNAS, STRBP, SPATA18, CERKL, OR5C1, CCL2, ITGB4, HOXD13, TBX4, TBX2, SYT4, sox9, MA…	592	3759	15360	1.14579
GOTERM_BP_ALL	GO:0051301~cell division	17	0.0222	0.0278793	NEK3, BIRC5, SEPT4, LIG3, CCNA1, CDK7, CDC6, PARD6B, RB1, LLGL2, ASPM, KIF2B, CDK3, CDK6, CCDC16, CDC26, CCNB1,	592	245	15360	1.80033
GOTERM_BP_ALL	GO:0000003~reproduction	31	0.0405	0.0302691	FOXJ1, LIG3, MYCBPAP, CCNA1, SPATA2, C17orf47, CCT6B, BRUNOL4, ACOX1, SLC9A10, VAPB, UTP14C, TUBD1, GNAS, STRBP, SPATA18, TAC1, SPO11, ATP7B, CCL2, SPACA3, PAPPA, CNGA1, sox9, RPS6KB1, PPP1R1B, SPAG9, COX11, ZPBP2, ZNF313, SPATA20,	592	543	15360	1.48126
GOTERM_BP_ALL	GO:0000074~regulation of progression through cell cycle	30	0.0392	0.0337297	PHB, CDK10, SUGT1, CCNA1, GTSE1, APBB2, CTCFL, CDC73, CDK3, SPHK1, GAS2L2, CCNB1, BIRC5, TADA2L, CDK7, DAB2IP, PPM1D, CDT1, STARD13, CDK5RAP3, MTUS1, CDC6, DBC1, BRIP1, RB1, TNFSF15, CDK6, PPP1R9B, COPS5, BMP7,	592	526	15360	1.47981
GOTERM_BP_ALL	GO:0045860~positive regulation of protein kinase activity	11	0.0144	0.0341378	GAP43, TNFSF15, DGKH, ERBB2, SPHK1, MAP2K1IP1, CERK, DGKE, C5, CERKL, HTR2A,	592	134	15360	2.12989
GOTERM_BP_ALL	GO:0006779~porphyrin biosynthetic process	4	0.0052	0.0347038	SUCLA2, NFE2L1, ALAD, RSAD1,	592	19	15360	5.4623
GOTERM_BP_ALL	GO:0033014~tetrapyrrole biosynthetic process	4	0.0052	0.0347038	SUCLA2, NFE2L1, ALAD, RSAD1,	592	19	15360	5.4623
GOTERM_BP_ALL	GO:0018106~peptidyl-histidine phosphorylation	3	0.0039	0.035474	PDK3, PDK2, PDK4,	592	8	15360	9.72973
GOTERM_BP_ALL	GO:0051726~regulation of cell cycle	30	0.0392	0.0356361	PHB, CDK10, SUGT1, CCNA1, GTSE1, APBB2, CTCFL, CDC73, CDK3, SPHK1, GAS2L2, CCNB1, BIRC5, TADA2L, CDK7, DAB2IP, PPM1D, CDT1, STARD13, CDK5RAP3, MTUS1, CDC6, DBC1, BRIP1, RB1, TNFSF15, CDK6, PPP1R9B, COPS5, BMP7,	592	529	15360	1.47141
GOTERM_BP_ALL	GO:0007163~establishment and/or maintenance of cell polarity	5	0.0065	0.0367101	CRB1, FOXJ1, FOXF1, ERBB2IP, PARD6B,	592	33	15360	3.9312
GOTERM_BP_ALL	GO:0007169~transmembrane receptor protein tyrosine kinase signaling pathway	14	0.0183	0.0372498	SOCS3, PTPN1, RGS2, LECT1, PIK3R1, SOCS7, ERBB2IP, GRB2, FOXO1A, MUSK, ERBB2, STXBP4, COL1A2, GRB7,	592	194	15360	1.87239
GOTERM_BP_ALL	GO:0043624~cellular protein complex disassembly	4	0.0052	0.0396935	SMARCE1, UPF1, ICT1, MTRF1,	592	20	15360	5.18919
GOTERM_BP_ALL	GO:0042542~response to hydrogen peroxide	4	0.0052	0.0396935	MPO, GLRX2, EPX, LPO,	592	20	15360	5.18919
GOTERM_BP_ALL	GO:0006886~intracellular protein transport	24	0.0314	0.0404522	AP2B1, PEX1, MRPL45, PEX12, TOB1, STX16, KPNA3, RFFL, RPL23, AP1GBP1, COPZ2, GGA3, PPP3CA, NDUFA13, STXBP4, GNAS, HOMER3, COG3, KPNB1, IPO11, NUP35, CLTC, APPBP2, NPEPL1,	592	405	15360	1.53754
GOTERM_BP_ALL	GO:0033674~positive regulation of kinase activity	11	0.0144	0.0404952	GAP43, TNFSF15, DGKH, ERBB2, SPHK1, MAP2K1IP1, CERK, DGKE, C5, CERKL, HTR2A,	592	138	15360	2.06816
GOTERM_BP_ALL	GO:0051234~establishment of localization	125	0.1634	0.0406592	STEAP4, SNX30, PCTP, SNX11, SLC25A30, ATP6V1G1, STARD3, GABRG1, MTTP, UPF1, COL1A2, SLC7A5, CACNB1, SLC31A1, ATP7B, SLC9A8, SLC31A2, SLC16A5, PPARA, UNC13D, TUBB1, SLC25A13, CYGB, GABRA4, NDUFA13, IPO11, RAB37, ATP5G1, KCTD2, BSPRY, GLRX2, ABCC3, OSBPL7, APBB2, ARFGEF1, GNAS, CASC3, KIF19, SNF8, NPEPL1, SLC39A11, BIRC5, AP2B1, RFFL, SYT4, ARMC1, SEC14L1, GGA3, ATP8A1, KIF12, ACCN1, BET1, COG1, SL…	592	2788	15360	1.16329
GOTERM_BP_ALL	GO:0048523~negative regulation of cellular process	56	0.0732	0.0427861	DDIT4L, TLR4, SOCS3, CDK10, LECT1, CTCFL, SSTR2, CDC73, SGK3, SALL4, SPHK1, FZD1, PRKRA, HTR2A, GAS2L2, TH1L, SMARCE1, GAS8, RGS13, PPM1D, RGS3, PIK3R1, CDT1, MTUS1, SOCS7, GSN, DBC1, RB1, NDUFA13, CDK6, PPP1R9B, CSF2, AATF, PHB, B4GALNT2, TOB1, RGS2, APBB2, NFKB1, ADAM22, GATAD2A, CCL2, BIRC5, MPO, IRF8, DAB2IP, TBX2, STARD13, CDC6, RGS21, sox9, FOXO1A, TNFSF15, BMP7, RGS18, SUPT4H1,	592	1132	15360	1.28355
GOTERM_BP_ALL	GO:0048519~negative regulation of biological process	58	0.0758	0.0441771	DDIT4L, TLR4, SOCS3, CDK10, LECT1, CTCFL, SSTR2, CDC73, SGK3, SALL4, SPHK1, FZD1, PRKRA, HTR2A, GAS2L2, TH1L, SMARCE1, GAS8, RGS13, PPM1D, RGS3, PIK3R1, CDT1, MTUS1, SOCS7, GSN, DBC1, RB1, PPP1R1B, NDUFA13, CDK6, PPP1R9B, CSF2, AATF, PHB, B4GALNT2, TOB1, RGS2, APBB2, NFKB1, ADAM22, NGFR, GATAD2A, CCL2, BIRC5, MPO, IRF8, DAB2IP, TBX2, STARD13, CDC6, RGS21, sox9, FOXO1A, TNFSF15, BMP7, RGS18, SUPT4…	592	1181	15360	1.27423
GOTERM_BP_ALL	GO:0006891~intra-Golgi vesicle-mediated transport	4	0.0052	0.045025	COPE, STX16, COG1, COG3,	592	21	15360	4.94208
GOTERM_BP_ALL	GO:0043241~protein complex disassembly	4	0.0052	0.045025	SMARCE1, UPF1, ICT1, MTRF1,	592	21	15360	4.94208
GOTERM_BP_ALL	GO:0051347~positive regulation of transferase activity	11	0.0144	0.0457655	GAP43, TNFSF15, DGKH, ERBB2, SPHK1, MAP2K1IP1, CERK, DGKE, C5, CERKL, HTR2A,	592	141	15360	2.02415
GOTERM_BP_ALL	GO:0045184~establishment of protein localization	39	0.051	0.0466	RAB22A, PEX1, SNX30, EXOC7, PEX12, COPE, TOB1, SNX11, KPNA3, RPL23, MTX2, COPZ2, ATG3, VPS36, STXBP4, GNAS, KPNB1, VPS37A, APPBP2, SNF8, NPEPL1, AP2B1, MRPL45, STX16, RFFL, AP1GBP1, GGA3, PPP3CA, NDUFA13, RAB14, BET1, COG6, HOMER3, COG3, COG1, IPO11, NUP35, CLTC, RAB37,	592	745	15360	1.35824
GOTERM_BP_ALL	GO:0006811~ion transport	43	0.0562	0.0471114	ATP6V1A, STEAP2, GABRB1, STEAP4, KCTD2, BSPRY, TRPC4, ATP9A, GABRA2, ATP6V1G1, GABRG1, SLC9A10, KCNB1, COL1A2, HTR2A, SLC31A1, CACNB1, ATP13A1, KCNRG, ATP7B, SLC9A8, SLC39A11, SLC16A5, SLC31A2, CNGA1, SLC30A9, ATP5H, SLC39A8, SLC10A4, ARMC1, KCNT2, ATP10D, GRIN2C, PPP3CA, ATP8A1, GABRA4, CACNA1G, ACCN1, SLC30A5, KCNG1, KCTD4, LASP1, ATP5G1,	592	837	15360	1.33295
GOTERM_BP_ALL	GO:0006869~lipid transport	9	0.0118	0.0494061	ATP8A1, MTTP, OSBPL6, PCTP, ATP9A, OSBPL7, PPARA, STARD3, ATP10D,	592	105	15360	2.22394
GOTERM_BP_ALL	GO:0032984~macromolecular complex disassembly	4	0.0052	0.0506919	SMARCE1, UPF1, ICT1, MTRF1,	592	22	15360	4.71744
GOTERM_BP_ALL	GO:0018202~peptidyl-histidine modification	3	0.0039	0.0541943	PDK3, PDK2, PDK4,	592	10	15360	7.78378
GOTERM_BP_ALL	GO:0007067~mitosis	15	0.0196	0.0562055	NEK3, BIRC5, SUGT1, CCNA1, GTSE1, CDC6, TUBB3, ASPM, KIF2B, CDK3, PPP1R9B, CCDC16, CDC26, AURKA, CCNB1,	592	227	15360	1.71449
GOTERM_BP_ALL	GO:0006829~zinc ion transport	4	0.0052	0.0566864	SLC39A11, SLC30A9, SLC39A8, SLC30A5,	592	23	15360	4.51234
GOTERM_BP_ALL	GO:0051318~G1 phase	4	0.0052	0.0566864	RB1, CDK10, CDK6, CDC6,	592	23	15360	4.51234
GOTERM_BP_ALL	GO:0006892~post-Golgi vesicle-mediated transport	4	0.0052	0.0566864	STEAP2, RAB14, GNAS, NBEA,	592	23	15360	4.51234
GOTERM_BP_ALL	GO:0065007~biological regulation	221	0.2889	0.0566943	DDIT4L, FOXJ1, TNFSF8, PTGS1, CDC73, ZNF652, CDC42EP4, UPF1, CDK3, ZBTB26, RGS13, SLC9A3R1, HOXD12, CDK5RAP3, RFXANK, CCR7, DFNB31, DUSP19, CDK6, CSF2, ZNFX1, ZNF618, EMCN, EIF4E, RGS2, TSHZ2, GTPBP1, CERKL, SNF8, BIRC5, ZNHIT3, TBX4, TBX2, RGS21, sox9, CHAD, HOXB1, GAP43, FOXF1, HOXB7, FOXL1, GTF2F2, LHX1, SUPT4H1, CFH, TLR4, HLF, NFXL1, CTCFL, SGK3, CORIN, FGF20, NEUROD2, SPHK1, PRKRA, HTR2A, N…	592	5238	15360	1.0947
GOTERM_BP_ALL	GO:0002573~myeloid leukocyte differentiation	5	0.0065	0.057086	RB1, TLR4, IL17C, TNFSF11, CSF2,	592	38	15360	3.41394
GOTERM_BP_ALL	GO:0007229~integrin-mediated signaling pathway	7	0.0092	0.0583872	ITGB4, ITGAV, ADAMTS6, ITGA3, ADAM22, ERBB2IP, ITGA4,	592	72	15360	2.52252
GOTERM_BP_ALL	GO:0000087~M phase of mitotic cell cycle	15	0.0196	0.0597295	NEK3, BIRC5, SUGT1, CCNA1, GTSE1, CDC6, TUBB3, ASPM, KIF2B, CDK3, PPP1R9B, CCDC16, CDC26, AURKA, CCNB1,	592	229	15360	1.69952
GOTERM_BP_ALL	GO:0048193~Golgi vesicle transport	9	0.0118	0.0617098	STEAP2, RAB14, COPE, GNAS, BET1, NBEA, STX16, COG1, COG3,	592	110	15360	2.12285
GOTERM_BP_ALL	GO:0017038~protein import	9	0.0118	0.0617098	PEX1, PPP3CA, NDUFA13, PEX12, TOB1, KPNB1, KPNA3, RPL23, IPO11,	592	110	15360	2.12285
GOTERM_BP_ALL	GO:0006778~porphyrin metabolic process	4	0.0052	0.0630002	SUCLA2, NFE2L1, ALAD, RSAD1,	592	24	15360	4.32432
GOTERM_BP_ALL	GO:0033013~tetrapyrrole metabolic process	4	0.0052	0.0630002	SUCLA2, NFE2L1, ALAD, RSAD1,	592	24	15360	4.32432
GOTERM_BP_ALL	GO:0035088~establishment and/or maintenance of apical/basal cell polarity	3	0.0039	0.0645885	FOXJ1, FOXF1, ERBB2IP,	592	11	15360	7.07617
GOTERM_BP_ALL	GO:0030705~cytoskeleton-dependent intracellular transport	10	0.0131	0.0660562	KIF2B, UCHL1, DYNC1I1, KIF12, TUBD1, APBB2, SPG7, KIF19, TUBB3, TUBB1,	592	131	15360	1.98061
GOTERM_BP_ALL	GO:0008277~regulation of G-protein coupled receptor protein signaling pathway	5	0.0065	0.0666267	RGS13, RGS3, RGS2, RGS18, PDCL,	592	40	15360	3.24324
GOTERM_BP_ALL	GO:0007018~microtubule-based movement	9	0.0118	0.0671229	KIF2B, UCHL1, DYNC1I1, KIF12, TUBD1, SPG7, KIF19, TUBB3, TUBB1,	592	112	15360	2.08494
GOTERM_BP_ALL	GO:0016049~cell growth	13	0.017	0.0676746	SOCS3, APBB2, SOCS7, ERBB2IP, CHAD, GAP43, RB1, FGF20, SPHK1, NDUFA13, PPP1R9B, IGFBP4, UBE2E3,	592	192	15360	1.75676
GOTERM_BP_ALL	GO:0009790~embryonic development	18	0.0235	0.0708492	CELSR1, USH1G, NFE2L2, HOXD13, TBX4, DLX5, HOXD8, SALL4, FOXF1, BRUNOL4, PCDH8, LHX1, DLX6, CCDC16, HOXB6, BMP7, NLE1, PRKRA,	592	299	15360	1.56196
GOTERM_BP_ALL	GO:0001558~regulation of cell growth	11	0.0144	0.0738761	RB1, GAP43, SOCS3, NDUFA13, SPHK1, PPP1R9B, APBB2, IGFBP4, UBE2E3, SOCS7, CHAD,	592	154	15360	1.85328
GOTERM_BP_ALL	GO:0006825~copper ion transport	3	0.0039	0.0755834	SLC31A2, SLC31A1, ATP7B,	592	12	15360	6.48649
GOTERM_BP_ALL	GO:0042744~hydrogen peroxide catabolic process	3	0.0039	0.0755834	MPO, EPX, LPO,	592	12	15360	6.48649
GOTERM_BP_ALL	GO:0008361~regulation of cell size	13	0.017	0.0786092	SOCS3, APBB2, SOCS7, ERBB2IP, CHAD, GAP43, RB1, FGF20, SPHK1, NDUFA13, PPP1R9B, IGFBP4, UBE2E3,	592	197	15360	1.71217
GOTERM_BP_ALL	GO:0045045~secretory pathway	15	0.0196	0.0786756	STEAP2, EXOC7, COPE, STX16, SYT4, UNC13D, ARFGEF1, RAB14, GNAS, CCL5, BET1, NBEA, COG3, COG1, HTR2A,	592	239	15360	1.62841
GOTERM_BP_ALL	GO:0007517~muscle development	12	0.0157	0.0803347	TNC, RB1, TAGLN3, MUSK, SRI, NGFR, BOC, SGCA, SGCB, UNC45B, SGCE, MEF2B,	592	177	15360	1.75905
GOTERM_BP_ALL	GO:0000302~response to reactive oxygen species	4	0.0052	0.0837603	MPO, GLRX2, EPX, LPO,	592	27	15360	3.84384
GOTERM_BP_ALL	GO:0006366~transcription from RNA polymerase II promoter	34	0.0444	0.0842397	HLF, ELF1, NFKB1, NEUROD1, SALL4, NEUROD2, TSC22D1, TFAP2C, SNF8, NUFIP1, NFE2L1, SMARCE1, CNOT7, TADA2L, NFE2L2, IRF8, HOXD13, CDK7, RFXAP, SP2, TBX2, PPARA, RFXANK, sox9, MEF2B, BRIP1, MED4, RB1, FOXO1A, FOXF1, GTF2F2, COPS5, SUPT4H1, THRA,	592	669	15360	1.31863
GOTERM_BP_ALL	GO:0044255~cellular lipid metabolic process	32	0.0418	0.0865566	PCYT1B, PTGS1, B4GALNT2, PCTP, DPM1, OSBPL7, STARD3, MVD, PGS1, FDXR, BDH2, ACOX1, MTTP, SPHK1, OSBPL6, PTGIS, CYP51A1, CYP7B1, ACACA, AGPS, CERK, PIK3R1, DGKE, PPARA, MTMR7, PCK1, ASAH1, PIK3C3, EBPL, UGCG, PIGW, LTB4DH,	592	624	15360	1.33056
GOTERM_BP_ALL	GO:0045667~regulation of osteoblast differentiation	3	0.0039	0.0871176	TOB1, CDK6, DLX5,	592	13	15360	5.98753
GOTERM_BP_ALL	GO:0000075~cell cycle checkpoint	6	0.0078	0.0896913	RB1, BIRC5, GTSE1, CDT1, CDC6, BRIP1,	592	62	15360	2.5109
GOTERM_BP_ALL	GO:0030005~cellular di-, tri-valent inorganic cation homeostasis	11	0.0144	0.0898514	CCL2, CCL14, SRI, GALR2, CCL5, SLC30A5, CCL1, TAC1, CCR7, ATP7B, EDG2,	592	160	15360	1.78378
GOTERM_BP_ALL	GO:0050790~regulation of catalytic activity	26	0.034	0.0899583	CALCR, C13orf18, CCNA1, MAP2K1IP1, DGKH, ERBB2, SPHK1, GNAS, RABGAP1, C5, CERKL, HTR2A, EDG2, BIRC5, TBC1D22A, CDK7, SLC9A3R1, RGS3, CERK, CDK5RAP3, DGKE, CDC6, RB1, GAP43, TNFSF15, DUSP19,	592	488	15360	1.38237
GOTERM_BP_ALL	GO:0055066~di-, tri-valent inorganic cation homeostasis	11	0.0144	0.0927009	CCL2, CCL14, SRI, GALR2, CCL5, SLC30A5, CCL1, TAC1, CCR7, ATP7B, EDG2,	592	161	15360	1.7727
GOTERM_BP_ALL	GO:0030326~embryonic limb morphogenesis	5	0.0065	0.0938029	SALL4, DLX6, HOXD13, TBX4, DLX5,	592	45	15360	2.88288
GOTERM_BP_ALL	GO:0035113~embryonic appendage morphogenesis	5	0.0065	0.0938029	SALL4, DLX6, HOXD13, TBX4, DLX5,	592	45	15360	2.88288
GOTERM_BP_ALL	GO:0055074~calcium ion homeostasis	9	0.0118	0.0949991	CCL2, CCL14, GALR2, CCL5, CCL1, TAC1, CCR7, ATP7B, EDG2,	592	121	15360	1.92986
GOTERM_BP_ALL	GO:0006874~cellular calcium ion homeostasis	9	0.0118	0.0949991	CCL2, CCL14, GALR2, CCL5, CCL1, TAC1, CCR7, ATP7B, EDG2,	592	121	15360	1.92986
GOTERM_BP_ALL	GO:0042743~hydrogen peroxide metabolic process	3	0.0039	0.0991333	MPO, EPX, LPO,	592	14	15360	5.55985
GOTERM_BP_ALL	GO:0006800~oxygen and reactive oxygen species metabolic process	5	0.0065	0.0997818	MPO, CYBA, NDUFA13, EPX, LPO,	592	46	15360	2.82021
GOTERM_BP_ALL	GO:0006497~protein amino acid lipidation	5	0.0065	0.0997818	ZDHHC7, MTTP, DPM1, PIGW, ZDHHC2,	592	46	15360	2.82021
GOTERM_CC_ALL	GO:0005737~cytoplasm	298	0.3895	6.79188e-07	DDIT4L, SAMD9, MRPS31, PTGS1, PCTP, SLC25A30, ATP6V1G1, ASPM, CDC42EP4, MTTP, UPF1, COL1A2, HDHD3, PSMB3, MRRF, NT5C, RGS13, PTPN1, MRPL27, CEP110, GRB2, DFNB31, MRPL10, PSMD3, EVPL, SPAG9, ORMDL3, DUSP19, CDK6, IPO11, LRRC59, ZNFX1, ATP5G1, BSPRY, EIF4E, SGCB, MGAT5B, COTL1, UBE2Z, TK1, STRBP, RPL7A, SPATA18, CERKL, SNF8, ABHD10, BIRC5, NEK7, MRPS7, MSI2, RFFL, TMC8, SEC14L1, SHFM1, PDK2, ZAR1, …	610	6219	15857	1.24562
GOTERM_CC_ALL	GO:0044444~cytoplasmic part	192	0.251	3.20293e-06	STEAP4, COX4NB, MRPS31, PTGS1, B3GALT2, SRP68, PCTP, DPM1, COX4I1, MAP2K1IP1, ATAD4, SLC25A30, STARD3, ATP6V1G1, MMD, MTTP, VAPB, HDHD3, TMEM49, PSMB3, MRRF, GALNS, ATP7B, CSPP1, ACN9, CCNB1, PTPN1, RGS13, MRPL27, MTUS1, CEP110, GRB2, SLC25A13, MRPL10, NDUFA13, PSMD3, SPAG9, ORMDL3, PCK1, LRRC59, RAB37, ATP5G1, PIGW, UCHL5, AFMID, GLRX2, EIF4E, SGCB, MRPS23, MGAT5B, FBF1, MRPL38, CALCOCO2, PGS1, …	610	3717	15857	1.34276
GOTERM_CC_ALL	GO:0044424~intracellular part	428	0.5595	3.34148e-05	DDIT4L, SAMD9, SLC25A30, CDC73, ZNF652, MTTP, MRRF, NEK3, PTPN1, RGS13, MRPL27, HOXD12, RFXANK, CEP110, HN1, TUBB1, SETDB2, MRPL10, ORMDL3, CDK6, IPO11, LRRC59, ZNFX1, BSPRY, SGCB, TSHZ2, RPL7A, ABHD10, BIRC5, NEK7, MRPS7, TBX2, DDX27, HOXB1, MANBA, TXK, FOXF1, HOXB7, ALG5, KIAA0368, SF4, COX11, RRS1, SLC35B1, CRISPLD2, SUPT4H1, ATP6V1A, PPWD1, HLF, STOM, TEX14, SLC35A5, FDXR, ACOX1, NEUROD2, STX…	610	9906	15857	1.12315
GOTERM_CC_ALL	GO:0043227~membrane-bound organelle	322	0.4209	0.000125812	FOXJ1, MRPS31, PTGS1, SLC25A30, ATP6V1G1, DCUN1D4, CDC73, DNAI2, ZNF652, ASPM, MTTP, HDHD3, PSMB3, MRRF, ZBTB26, NEK3, NT5C, RGS13, PTPN1, MRPL27, HOXD12, RFXANK, CEP110, GRB2, HN1, SETDB2, MRPL10, SPAG9, ORMDL3, CDK6, IPO11, NLE1, LRRC59, ZNFX1, ZNF618, ATP5G1, MGAT5B, TSHZ2, UBE2Z, STRBP, CERKL, SNF8, ABHD10, BIRC5, MRPS7, TBX4, RFXAP, TBX2, RFFL, DDX27, TMC8, SEC14L1, sox9, SHFM1, MAB21L1, PDK…	610	7194	15857	1.16353
GOTERM_CC_ALL	GO:0043231~intracellular membrane-bound organelle	321	0.4196	0.000166931	FOXJ1, MRPS31, PTGS1, SLC25A30, ATP6V1G1, DCUN1D4, CDC73, DNAI2, ZNF652, ASPM, MTTP, HDHD3, PSMB3, MRRF, ZBTB26, NEK3, NT5C, RGS13, PTPN1, MRPL27, HOXD12, RFXANK, CEP110, HN1, SETDB2, MRPL10, SPAG9, ORMDL3, CDK6, IPO11, NLE1, LRRC59, ZNFX1, ZNF618, ATP5G1, MGAT5B, TSHZ2, UBE2Z, STRBP, CERKL, SNF8, ABHD10, BIRC5, MRPS7, TBX4, RFXAP, TBX2, RFFL, DDX27, TMC8, SEC14L1, sox9, SHFM1, MAB21L1, PDK2, MAN…	610	7191	15857	1.1604
GOTERM_CC_ALL	GO:0005622~intracellular	446	0.583	0.000216659	DDIT4L, SAMD9, SLC25A30, CDC73, ZNF652, MTTP, MRRF, NEK3, PTPN1, RGS13, MRPL27, HOXD12, RFXANK, CEP110, HN1, TUBB1, SETDB2, MRPL10, RNF166, RASL10B, ORMDL3, CDK6, IPO11, LRRC59, ZNFX1, BSPRY, SGCB, TSHZ2, RPL7A, ABHD10, BIRC5, NEK7, ZNHIT3, MRPS7, TBX2, DDX27, HOXB1, MANBA, TXK, FOXF1, HOXB7, ALG5, KIAA0368, SF4, COX11, RRS1, SLC35B1, CRISPLD2, SUPT4H1, PPWD1, ATP6V1A, HLF, STOM, TEX14, SLC35A5, …	610	10544	15857	1.09956
GOTERM_CC_ALL	GO:0043226~organelle	358	0.468	0.00079979	FOXJ1, MRPS31, PTGS1, SLC25A30, ATP6V1G1, DCUN1D4, CDC73, DNAI2, ZNF652, ASPM, CDC42EP4, MTTP, UPF1, HDHD3, PSMB3, MRRF, ZBTB26, NEK3, NT5C, RGS13, PTPN1, MRPL27, SLC9A3R1, HOXD12, RFXANK, CEP110, GRB2, HN1, SETDB2, TUBB1, MRPL10, EVPL, SPAG9, ORMDL3, CDK6, IPO11, NLE1, LRRC59, ZNFX1, ZNF618, ATP5G1, SGCB, MGAT5B, TSHZ2, COTL1, UBE2Z, STRBP, RPL7A, CERKL, SNF8, ABHD10, BIRC5, RFXAP, TBX4, MRPS7, …	610	8292	15857	1.12232
GOTERM_CC_ALL	GO:0043229~intracellular organelle	357	0.4667	0.00101666	FOXJ1, MRPS31, PTGS1, SLC25A30, ATP6V1G1, DCUN1D4, CDC73, DNAI2, ZNF652, ASPM, CDC42EP4, MTTP, UPF1, HDHD3, PSMB3, MRRF, ZBTB26, NEK3, NT5C, RGS13, PTPN1, MRPL27, SLC9A3R1, HOXD12, RFXANK, CEP110, HN1, SETDB2, TUBB1, MRPL10, EVPL, SPAG9, ORMDL3, CDK6, IPO11, NLE1, LRRC59, ZNFX1, ZNF618, ATP5G1, SGCB, MGAT5B, TSHZ2, COTL1, UBE2Z, STRBP, RPL7A, CERKL, SNF8, ABHD10, BIRC5, RFXAP, TBX4, MRPS7, RFFL, …	610	8288	15857	1.11972
GOTERM_CC_ALL	GO:0005739~mitochondrion	56	0.0732	0.00201247	ATP6V1A, NDUFA8, TRMU, COX4NB, MRPS31, AKAP1, COX4I1, SLC25A30, MTX2, FDXR, BDH2, ACOX1, HDHD3, BZRAP1, MRRF, GPRC5C, RSAD1, ATP7B, ACN9, SEPT4, NLN, MRPL45, AGPS, MRPL27, MTUS1, SLC25A15, PDK4, SLC25A13, MRPL10, NDUFA13, COX7B2, CLTC, ATP5G1, PHB, CYBA, SLC25A19, GLRX2, MRPS23, FBF1, MRPL38, SPG7, MRM1, PGS1, MTRF1, MTFR1, ABHD10, SUCLA2, PDK3, ATP5H, CYP24A1, MRPS7, STARD13, PDK2, TUBB3, PTRH2,…	610	963	15857	1.51166
GOTERM_CC_ALL	GO:0005829~cytosol	35	0.0458	0.00206815	STEAP2, UCHL5, PEX1, AFMID, UCHL1, CCNA1, PCTP, ATAD4, RPL13, ATG3, SPHK1, PSMD5, RPL7A, RPL19, RABGAP1, PSMB3, NUFIP1, BIRC5, RPL38, DAPP1, RGS13, MRPS7, RGS3, PIK3R1, GRB2, SHFM1, GSN, PSMD3, RAB14, KIAA0368, PFDN4, PCK1, NBEA, LCP1, PIK3C3,	610	524	15857	1.73631
GOTERM_CC_ALL	GO:0005798~Golgi-associated vesicle	9	0.0118	0.00245517	COPZ2, STEAP2, AP2B1, GGA3, RAB14, KIAA0368, COPE, AP1GBP1, CLTC,	610	62	15857	3.77348
GOTERM_CC_ALL	GO:0005770~late endosome	8	0.0105	0.00395749	VPS36, RAB14, KIAA0368, MAP2K1IP1, VPS37A, STARD3, ATP7B, MMD,	610	53	15857	3.92379
GOTERM_CC_ALL	GO:0044431~Golgi apparatus part	26	0.034	0.00430399	STEAP2, STEAP4, XYLT2, B4GALNT2, B3GALT2, COPE, TRIM23, MGAT5B, SLC35A5, COPZ2, GNAS, ATP7B, AP2B1, CBFA2T3, STX16, AP1GBP1, ST6GALNAC1, GGA3, RAB14, KIAA0368, BET1, COG6, NBEA, COG3, COG1, CLTC,	610	368	15857	1.83661
GOTERM_CC_ALL	GO:0015630~microtubule cytoskeleton	27	0.0353	0.00781178	DYNC1I1, TRIM55, CCNA1, GTSE1, DNAI2, TUBD1, PCM1, RABGAP1, AURKA, APPBP2, KIF19, CSPP1, CCNB1, BIRC5, CDK5RAP2, GAS8, CDC6, CEP110, DYNLL2, TUBB3, TUBB1, CKAP2, RB1, KIF2B, KIF12, KIAA0368, AKAP9,	610	406	15857	1.72874
GOTERM_CC_ALL	GO:0030140~trans-Golgi network transport vesicle	6	0.0078	0.00800119	STEAP2, AP2B1, GGA3, RAB14, AP1GBP1, CLTC,	610	33	15857	4.72638
GOTERM_CC_ALL	GO:0030133~transport vesicle	8	0.0105	0.00939891	STEAP2, AP2B1, GGA3, RAB14, KIAA0368, AP1GBP1, CLTC, CRISPLD2,	610	62	15857	3.3542
GOTERM_CC_ALL	GO:0005813~centrosome	12	0.0157	0.0103285	BIRC5, KIF2B, CDK5RAP2, KIAA0368, TUBD1, AKAP9, PCM1, RABGAP1, CEP110, AURKA, CSPP1, CCNB1,	610	128	15857	2.43704
GOTERM_CC_ALL	GO:0005815~microtubule organizing center	12	0.0157	0.0200787	BIRC5, KIF2B, CDK5RAP2, KIAA0368, TUBD1, AKAP9, PCM1, RABGAP1, CEP110, AURKA, CSPP1, CCNB1,	610	141	15857	2.21235
GOTERM_CC_ALL	GO:0005794~Golgi apparatus	36	0.0471	0.0267808	STEAP2, STEAP4, B4GALT5, XYLT2, B3GALT2, B4GALNT2, COPE, TRIM23, MGAT5B, SLC35A5, CALCOCO2, COPZ2, VAPB, GNAS, TMEM49, ATP7B, AP2B1, GAS8, CBFA2T3, VCPIP1, STX16, MTUS1, AP1GBP1, SEC14L1, ST6GALNAC1, GGA3, RAB14, KIAA0368, BET1, COG6, NBEA, AKAP9, COG3, COG1, SLC30A5, CLTC,	610	648	15857	1.44417
GOTERM_CC_ALL	GO:0016012~sarcoglycan complex	3	0.0039	0.027199	SGCA, SGCB, SGCE,	610	7	15857	11.1407
GOTERM_CC_ALL	GO:0031988~membrane-bound vesicle	22	0.0288	0.027934	STEAP2, SPACA3, AP2B1, TMEM33, STOM, COPE, ESD, RFFL, SYT4, AP1GBP1, GRB2, SGK3, COPZ2, GGA3, KIAA0368, RAB14, SLC30A5, CRISPLD2, CLTC, GPRC5C, RAB37, ATP7B,	610	348	15857	1.64337
GOTERM_CC_ALL	GO:0031090~organelle membrane	68	0.0889	0.0280745	NDUFA8, STEAP2, STEAP4, PEX1, B3GALT2, AKAP1, COPE, DPM1, COX4I1, MAP2K1IP1, SLC25A30, MTX2, STARD3, ATP6V1G1, SLC35A5, MMD, COPZ2, FDXR, ACOX1, VAPB, PTGIS, GPRC5C, CYP7B1, PTPN1, MRPL45, AGPS, STX16, GRB2, SLC25A15, PDK4, SLC25A13, ST6GALNAC1, NDUFA13, COG6, COX7B2, IPO11, CLTC, ATP5G1, PIGW, PHB, RAB22A, XYLT2, SLC25A19, B4GALNT2, PEX12, TRIM23, KPNA3, MGAT5B, SPG7, JPH3, TMC6, KPNB1, VPS37A, …	610	1385	15857	1.27629
GOTERM_CC_ALL	GO:0045202~synapse	16	0.0209	0.0302413	GABRB1, APBB2, SYT4, GABRA2, PPP1R9A, GAP43, GRIN2C, CBLN4, GABRG1, RPS6KB1, GABRA4, CDH15, PPP1R9B, NBEA, HOMER3, NUFIP1,	610	228	15857	1.82422
GOTERM_CC_ALL	GO:0005874~microtubule	16	0.0209	0.0356767	BIRC5, GAS8, DYNC1I1, TRIM55, GTSE1, DYNLL2, TUBB1, TUBB3, CKAP2, DNAI2, KIF2B, KIF12, TUBD1, APPBP2, KIF19, CSPP1,	610	233	15857	1.78507
GOTERM_CC_ALL	GO:0031982~vesicle	25	0.0327	0.0362087	STEAP2, TMEM33, COPE, STOM, ESD, EPN3, COPZ2, SGK3, GNAS, GPRC5C, ATP7B, SPACA3, AP2B1, RFFL, AP1GBP1, SYT4, GRB2, ATP8A1, GGA3, RAB14, KIAA0368, SLC30A5, CLTC, CRISPLD2, RAB37,	610	422	15857	1.53999
GOTERM_CC_ALL	GO:0005768~endosome	14	0.0183	0.0394731	STEAP2, RAB22A, OCIAD2, MAP2K1IP1, OCIAD1, STARD3, MMD, SGK3, VPS36, GGA3, KIAA0368, RAB14, VPS37A, ATP7B,	610	196	15857	1.85679
GOTERM_CC_ALL	GO:0016023~cytoplasmic membrane-bound vesicle	21	0.0275	0.0423331	STEAP2, SPACA3, AP2B1, TMEM33, STOM, COPE, ESD, RFFL, SYT4, AP1GBP1, SGK3, COPZ2, GGA3, KIAA0368, RAB14, SLC30A5, CRISPLD2, CLTC, GPRC5C, RAB37, ATP7B,	610	342	15857	1.59619
GOTERM_CC_ALL	GO:0016011~dystroglycan complex	3	0.0039	0.0443188	SGCA, SGCB, SGCE,	610	9	15857	8.66503
GOTERM_CC_ALL	GO:0000139~Golgi membrane	20	0.0261	0.0460532	STEAP2, AP2B1, STEAP4, XYLT2, CBFA2T3, B3GALT2, B4GALNT2, COPE, STX16, TRIM23, AP1GBP1, MGAT5B, SLC35A5, COPZ2, ST6GALNAC1, GGA3, BET1, COG6, COG1, CLTC,	610	325	15857	1.5997
GOTERM_CC_ALL	GO:0030130~clathrin coat of trans-Golgi network vesicle	4	0.0052	0.0504664	AP2B1, GGA3, AP1GBP1, CLTC,	610	22	15857	4.72638
GOTERM_CC_ALL	GO:0030120~vesicle coat	6	0.0078	0.055595	COPZ2, AP2B1, GGA3, COPE, AP1GBP1, CLTC,	610	54	15857	2.88834
GOTERM_CC_ALL	GO:0032991~macromolecular complex	116	0.1516	0.0564065	MRPS31, SRP68, H2AFZ, DPM1, ATAD4, ITGA4, ATP6V1G1, DNAI2, C5, PSMB3, CACNB1, ITGA3, MRPL27, TUBB1, MRPL10, PSMD3, NDUFA13, CDK6, SFRS1, IPO11, FGL1, ATP5G1, KCTD2, GNG10, UCHL5, SUGT1, EIF4E, SGCB, MRPS23, FBF1, MRPL38, GNAS, RPL7A, RABGAP1, CASC3, KIF19, TROVE2, BIRC5, ITGB4, AP2B1, MRPS7, TBX2, SHFM1, FOXF1, ITGAV, GTF2F2, GGA3, KIF12, KIAA0368, SF4, PFDN4, COG1, GNGT2, RAE1, KCTD4, KCNG1, NDU…	610	2609	15857	1.15578
GOTERM_CC_ALL	GO:0012510~trans-Golgi network transport vesicle membrane	4	0.0052	0.0564369	AP2B1, GGA3, AP1GBP1, CLTC,	610	23	15857	4.52088
GOTERM_CC_ALL	GO:0005624~membrane fraction	38	0.0497	0.0693177	STEAP2, SLC7A2, CA4, PTGS1, B4GALNT2, ABCC3, DPEP1, SSTR2, MMD, MTTP, KCNB1, SPHK1, GNAS, RPL7A, PTGIS, CACNB1, ATP7B, CYP7B1, SLC16A5, CNGA1, LSAMP, ITGA3, STX16, CERK, PPP1R9A, ITM2B, RPS6KB1, PON1, RAB14, CACNA1G, GALK1, RAPGEFL1, ACCN1, SLC30A5, SLC35B1, LRRC59, UGCG, ATP5G1,	610	749	15857	1.31884
GOTERM_CC_ALL	GO:0005802~trans-Golgi network	4	0.0052	0.0693239	GGA3, KIAA0368, NBEA, ATP7B,	610	25	15857	4.15921
GOTERM_CC_ALL	GO:0030662~coated vesicle membrane	6	0.0078	0.0712928	COPZ2, AP2B1, GGA3, COPE, AP1GBP1, CLTC,	610	58	15857	2.68915
GOTERM_CC_ALL	GO:0005634~nucleus	197	0.2575	0.0722016	FOXJ1, PTGS1, DCUN1D4, CDC73, ZNF652, ASPM, PSMB3, ZBTB26, NEK3, NT5C, RGS13, HOXD12, RFXANK, CEP110, HN1, SETDB2, CDK6, IPO11, NLE1, ZNFX1, ZNF618, TSHZ2, UBE2Z, STRBP, CERKL, SNF8, BIRC5, TBX4, RFXAP, TBX2, DDX27, sox9, SHFM1, MAB21L1, HOXB1, FOXF1, HOXB7, FOXL1, GTF2F2, LHX1, KIAA0368, TRIM32, SF4, RRS1, SUPT4H1, PPWD1, TRIM55, HLF, NFXL1, CTCFL, NEUROD2, APPBP2, NUFIP1, MYBL1, SMARCE1, TADA2L…	610	4664	15857	1.09799
GOTERM_CC_ALL	GO:0044464~cell part	586	0.766	0.0735885	CELSR1, OR1L3, DDIT4L, SAMD9, RNF183, SLC25A30, CDC73, ZNF652, MTTP, TMPRSS7, SLC31A1, MRRF, NEK3, SLC16A5, RGS13, PTPN1, MRPL27, HOXD12, RFXANK, CEP110, ZDHHC23, HN1, TUBB1, SETDB2, MRPL10, RASL10B, RNF166, TM6SF2, MXRA7, ORMDL3, CDH15, CDK6, TMEM100, IPO11, LRRC59, ZNFX1, KCTD2, GNG10, BSPRY, EMCN, ABCC3, SGCB, TSHZ2, GDPD1, RPL7A, ABHD10, SLC39A11, BIRC5, NEK7, ZNHIT3, SVEP1, SIDT1, MRPS7, TBX…	610	15019	15857	1.01426
GOTERM_CC_ALL	GO:0005623~cell	586	0.766	0.0745424	CELSR1, OR1L3, DDIT4L, SAMD9, RNF183, SLC25A30, CDC73, ZNF652, MTTP, TMPRSS7, SLC31A1, MRRF, NEK3, SLC16A5, RGS13, PTPN1, MRPL27, HOXD12, RFXANK, CEP110, ZDHHC23, HN1, TUBB1, SETDB2, MRPL10, RASL10B, RNF166, TM6SF2, MXRA7, ORMDL3, CDH15, CDK6, TMEM100, IPO11, LRRC59, ZNFX1, KCTD2, GNG10, BSPRY, EMCN, ABCC3, SGCB, TSHZ2, GDPD1, RPL7A, ABHD10, SLC39A11, BIRC5, NEK7, ZNHIT3, SVEP1, SIDT1, MRPS7, TBX…	610	15020	15857	1.01419
GOTERM_CC_ALL	GO:0031410~cytoplasmic vesicle	23	0.0301	0.0765233	STEAP2, SPACA3, AP2B1, TMEM33, STOM, COPE, ESD, RFFL, SYT4, AP1GBP1, EPN3, SGK3, COPZ2, GGA3, ATP8A1, KIAA0368, RAB14, SLC30A5, CRISPLD2, CLTC, GPRC5C, RAB37, ATP7B,	610	413	15857	1.44767
GOTERM_CC_ALL	GO:0042995~cell projection	20	0.0261	0.0789752	GAS8, CNGA1, UCHL1, SLC9A3R1, APBB2, SYT4, C17orf47, PPP1R9A, DFNB31, GSN, GAP43, DNAI2, CYGB, SLC9A10, ABI3, GNAS, CDK6, PPP1R9B, LCP1, HTR2A,	610	348	15857	1.49397
GOTERM_CC_ALL	GO:0044448~cell cortex part	5	0.0065	0.0819561	TRPC4, EXOC7, PPP1R9B, PPP1R9A, LASP1,	610	43	15857	3.02268
GOTERM_CC_ALL	GO:0030135~coated vesicle	10	0.0131	0.0844593	COPZ2, STEAP2, AP2B1, GGA3, RAB14, KIAA0368, COPE, SYT4, AP1GBP1, CLTC,	610	138	15857	1.8837
GOTERM_CC_ALL	GO:0005938~cell cortex	6	0.0078	0.0891687	TRPC4, EXOC7, PPP1R9B, PPP1R9A, PARD6B, LASP1,	610	62	15857	2.51565
GOTERM_CC_ALL	GO:0005834~heterotrimeric G-protein complex	4	0.0052	0.0908709	GNG11, GNG10, GNAS, GNGT2,	610	28	15857	3.71358
GOTERM_CC_ALL	GO:0031902~late endosome membrane	4	0.0052	0.0986011	MAP2K1IP1, VPS37A, STARD3, MMD,	610	29	15857	3.58553
GOTERM_CC_ALL	GO:0030863~cortical cytoskeleton	4	0.0052	0.0986011	TRPC4, PPP1R9B, PPP1R9A, LASP1,	610	29	15857	3.58553
GOTERM_MF_ALL	GO:0005488~binding	525	0.6863	1.25702e-06	CELSR1, RNF183, SLC25A30, PNPO, CDC73, ZNF652, MTTP, CDK3, CPB2, SLC31A1, NEK3, PTPN1, RGS13, HOXD12, RFXANK, CEP110, ZDHHC23, TUBB1, SETDB2, RNF166, RASL10B, CDH15, CDK6, IPO11, LRRC59, ZNFX1, MMP28, KCTD2, GNG10, BSPRY, EMCN, RGS2, ABCC3, TSHZ2, UNC45B, MVD, RPL7A, SLC39A11, BIRC5, NEK7, ZNHIT3, SVEP1, MRPS7, TBX2, DDX27, CHAD, GAP43, MANBA, TXK, HOXB1, HOXB7, FOXF1, ITGAV, LRRC46, KIAA0368, SF…	621	13054	16968	1.09889
GOTERM_MF_ALL	GO:0003700~transcription factor activity	64	0.0837	4.52341e-05	MYST2, HOXB5, FOXJ1, HOXD9, HLF, NFXL1, NEUROD2, DLX6, TSC22D1, TFAP2C, TADA2L, HOXD12, PPARA, RFXANK, HOXD8, HOXB13, MEF2B, RB1, ZNF80, EVX2, RARA, HOXB6, THRA, ZNFX1, ZFP37, AATF, ELF1, DLX5, NFKB1, TSHZ2, NR1D1, HOXB3, LHX9, PCGF2, HOXB2, ADNP, ARX, GATAD2A, PHOX2B, NFE2L1, CNOT7, SLC30A9, CBFA2T3, NFE2L2, IRF8, DLX3, HOXD13, TBX4, RFXAP, TBX2, GATAD1, HOXD10, HOXD3, LHX6, NFATC2, HOXB1, HOXD1…	621	1034	16968	1.69121
GOTERM_MF_ALL	GO:0043565~sequence-specific DNA binding	41	0.0536	5.93994e-05	FOXJ1, HOXB5, HOXD9, HLF, ELF1, DLX5, TSHZ2, NR1D1, HOXB3, LHX9, DLX6, HOXB2, ADNP, ARX, GATAD2A, PHOX2B, NFE2L1, NFE2L2, DLX3, HOXD13, TBX2, HOXD12, GATAD1, PPARA, HOXD3, HOXD10, HOXD8, HOXB13, MEF2B, LHX6, HOXB1, HOXD1, FOXL1, FOXO1A, FOXF1, HOXB7, LHX1, EVX2, RARA, HOXB6, THRA,	621	568	16968	1.97231
GOTERM_MF_ALL	GO:0022892~substrate-specific transporter activity	67	0.0876	9.7774e-05	ATP6V1A, GABRB1, TSPAN5, SLC7A2, COPE, PCTP, COX4I1, STARD3, ATP6V1G1, SLC35A5, GABRG1, MTTP, KCNB1, SLC7A5, CACNB1, SLC31A1, ATP7B, SLC9A8, SLC31A2, SLC16A5, MRPL45, STX16, SLC10A4, KCNT2, ATP10D, SLC25A15, CYGB, SLC25A13, GRIN2C, GABRA4, PON1, CACNA1G, COX7B2, IPO11, CLTC, ATP5G1, LASP1, KCTD2, SLC25A19, TRPC4, ATP9A, ABCC3, KPNA3, GABRA2, CCT6B, SLC9A10, LRCH1, KPNB1, KCNRG, ATP13A1, NPEPL1, S…	621	1127	16968	1.62439
GOTERM_MF_ALL	GO:0005515~protein binding	308	0.4026	0.00019992	CELSR1, TNFSF8, SNX30, PDE1A, RNF183, ATP6V1G1, CDC73, ZDHHC7, ZNF652, ASPM, CDC42EP4, UPF1, CDK3, COL1A2, PSMB3, ARMC6, ZBTB26, NEK3, RGS13, PTPN1, ITGA3, SLC9A3R1, CDK5RAP3, RFXANK, CEP110, GRB2, CCR7, DFNB31, RNF166, PSMD3, EVPL, SPAG9, CDH15, DUSP19, CDK6, IPO11, CSF2, LRRC59, ZNF618, KCTD2, GNG10, RCBTB2, EIF4E, RGS2, COTL1, NPEPL1, BIRC5, ITGB4, WFIKKN2, NEK7, ZNHIT3, MRPS7, TBX4, RFXAP, TB…	621	7212	16968	1.1669
GOTERM_MF_ALL	GO:0030528~transcription regulator activity	80	0.1046	0.00107034	MYST2, HOXB5, FOXJ1, HOXD9, NFXL1, HLF, NEUROD1, NEUROD2, DLX6, TSC22D1, TFAP2C, MYBL1, SMARCE1, TADA2L, CDK7, HOXD12, PPARA, RFXANK, HOXD8, CEP110, HOXB13, MEF2B, MED4, RB1, ZNF80, EVX2, RARA, HOXB6, KIAA2018, THRA, ZNFX1, ZFP37, AATF, PHB, TOB1, ELF1, DLX5, NFKB1, TSHZ2, NR1D1, HOXB3, LHX9, PCGF2, HOXB2, ADNP, ARX, CRKRS, GATAD2A, SNF8, PHOX2B, NFE2L1, CNOT7, SLC30A9, CBFA2T3, NFE2L2, IRF8, DLX…	621	1534	16968	1.42496
GOTERM_MF_ALL	GO:0008565~protein transporter activity	13	0.017	0.00147405	AP2B1, MRPL45, COPE, STX16, KPNA3, CCT6B, GGA3, COG3, KPNB1, COG1, IPO11, CLTC, NPEPL1,	621	120	16968	2.96006
GOTERM_MF_ALL	GO:0004143~diacylglycerol kinase activity	5	0.0065	0.00174647	DGKH, SPHK1, CERK, DGKE, CERKL,	621	15	16968	9.10789
GOTERM_MF_ALL	GO:0017111~nucleoside-triphosphatase activity	39	0.051	0.00211962	ATP6V1A, GNG10, GNG11, RAB22A, PEX1, DDX52, DHX40, ATP9A, DDX49, ABCC3, TRIM23, ATAD4, SPG7, ATP6V1G1, GTPBP1, UPF1, RFC3, GNAS, ADNP, RIT2, ATP13A1, ATP7B, SEPT4, ATP5H, DDX27, CDC6, ATP10D, TUBB3, TUBB1, BRIP1, GNAT1, ATP8A1, RAB14, RAD51C, GUF1, RAD51L3, GNGT2, RECQL5, ATP5G1,	621	637	16968	1.67288
GOTERM_MF_ALL	GO:0016817~hydrolase activity, acting on acid anhydrides	40	0.0523	0.00339865	ATP6V1A, GNG10, GNG11, RAB22A, PEX1, DDX52, DHX40, ATP9A, DDX49, ABCC3, TRIM23, ATAD4, SPG7, ATP6V1G1, GTPBP1, UPF1, RFC3, GNAS, ADNP, RIT2, ATP13A1, ATP7B, SEPT4, ATP5H, DDX27, CDC6, ATP10D, TUBB3, TUBB1, BRIP1, GNAT1, ATP8A1, RAB14, RAD51C, GUF1, KIAA0195, RAD51L3, GNGT2, RECQL5, ATP5G1,	621	677	16968	1.6144
GOTERM_MF_ALL	GO:0005215~transporter activity	73	0.0954	0.00382397	ATP6V1A, STEAP2, GABRB1, TSPAN5, SLC7A2, COPE, PCTP, COX4I1, SLC25A30, STARD3, ATP6V1G1, SLC35A5, GABRG1, MTTP, KCNB1, SLC7A5, CACNB1, SLC31A1, ATP7B, SLC9A8, SLC31A2, SLC16A5, MRPL45, STX16, SLC10A4, KCNT2, ATP10D, SLC25A15, CYGB, SLC25A13, GRIN2C, GABRA4, PON1, CACNA1G, COX7B2, IPO11, CLTC, LASP1, ATP5G1, KCTD2, NUP85, SLC25A19, TRPC4, ATP9A, ABCC3, KPNA3, GABRA2, CCT6B, CPNE7, SLC9A10, LRCH1, …	621	1438	16968	1.38708
GOTERM_MF_ALL	GO:0004064~arylesterase activity	3	0.0039	0.00390204	PON1, PON2, PON3,	621	3	16968	27.3237
GOTERM_MF_ALL	GO:0016462~pyrophosphatase activity	39	0.051	0.00438461	ATP6V1A, GNG10, GNG11, RAB22A, PEX1, DDX52, DHX40, ATP9A, DDX49, ABCC3, TRIM23, ATAD4, SPG7, ATP6V1G1, GTPBP1, UPF1, RFC3, GNAS, ADNP, RIT2, ATP13A1, ATP7B, SEPT4, ATP5H, DDX27, CDC6, ATP10D, TUBB3, TUBB1, BRIP1, GNAT1, ATP8A1, RAB14, RAD51C, GUF1, RAD51L3, GNGT2, RECQL5, ATP5G1,	621	665	16968	1.60244
GOTERM_MF_ALL	GO:0016818~hydrolase activity, acting on acid anhydrides, in phosphorus-containing anhydrides	39	0.051	0.00480534	ATP6V1A, GNG10, GNG11, RAB22A, PEX1, DDX52, DHX40, ATP9A, DDX49, ABCC3, TRIM23, ATAD4, SPG7, ATP6V1G1, GTPBP1, UPF1, RFC3, GNAS, ADNP, RIT2, ATP13A1, ATP7B, SEPT4, ATP5H, DDX27, CDC6, ATP10D, TUBB3, TUBB1, BRIP1, GNAT1, ATP8A1, RAB14, RAD51C, GUF1, RAD51L3, GNGT2, RECQL5, ATP5G1,	621	669	16968	1.59286
GOTERM_MF_ALL	GO:0022891~substrate-specific transmembrane transporter activity	50	0.0654	0.00532568	ATP6V1A, GABRB1, TSPAN5, SLC7A2, COX4I1, ATP6V1G1, SLC35A5, GABRG1, KCNB1, SLC7A5, CACNB1, SLC31A1, ATP7B, SLC9A8, SLC31A2, SLC16A5, MRPL45, SLC10A4, KCNT2, ATP10D, SLC25A15, GRIN2C, SLC25A13, GABRA4, CACNA1G, COX7B2, ATP5G1, LASP1, KCTD2, SLC25A19, TRPC4, ATP9A, ABCC3, GABRA2, SLC9A10, LRCH1, KCNRG, ATP13A1, SLC39A11, CNGA1, SLC30A9, SLC39A8, ATP5H, ATP8A1, ACCN1, COX11, SLC30A5, SLC35B1, KCTD4,…	621	921	16968	1.48337
GOTERM_MF_ALL	GO:0043167~ion binding	189	0.2471	0.00678458	CELSR1, STEAP4, PTGS1, B3GALT2, RNF183, ITGA4, ATP6V1G1, ZDHHC7, SALL4, GABRG1, ZNF652, DGKH, UPF1, CPA6, CPB2, CACNB1, SLC31A1, GALNS, CYP51A1, ZBTB26, ATP7B, SLC9A8, NEK3, NT5C, SLC31A2, ACACA, ITGA3, PPARA, ZDHHC23, SETDB2, CYGB, SLC25A13, RNF166, GABRA4, CDH15, RARA, ZNFX1, MMP28, THRA, ZNF618, CA10, LIG3, GLRX2, BSPRY, CA4, MGAT5B, TSHZ2, NR1D1, LHX9, ERBB2, RNF157, PHF11, NPEPL1, BIRC5, SLC…	621	4397	16968	1.17448
GOTERM_MF_ALL	GO:0004740~pyruvate dehydrogenase (acetyl-transferring) kinase activity	3	0.0039	0.00761514	PDK3, PDK2, PDK4,	621	4	16968	20.4928
GOTERM_MF_ALL	GO:0042623~ATPase activity, coupled	21	0.0275	0.00788885	ATP6V1A, PEX1, DDX52, DHX40, ATP5H, ATP9A, DDX49, ABCC3, DDX27, ATP6V1G1, ATP10D, BRIP1, ATP8A1, UPF1, RAD51C, RFC3, RAD51L3, ATP13A1, RECQL5, ATP5G1, ATP7B,	621	302	16968	1.89999
GOTERM_MF_ALL	GO:0016563~transcription activator activity	22	0.0288	0.0086085	MYBL1, SMARCE1, CNOT7, PHB, HOXD9, NFE2L2, CDK7, RFXAP, ELF1, PPARA, RFXANK, sox9, MEF2B, NEUROD1, MED4, NFATC2, RB1, FOXF1, FOXO1A, TRIM32, RARA, COPS5,	621	325	16968	1.8496
GOTERM_MF_ALL	GO:0046872~metal ion binding	184	0.2405	0.0104361	CELSR1, STEAP4, PTGS1, B3GALT2, RNF183, ITGA4, ATP6V1G1, ZDHHC7, SALL4, ZNF652, DGKH, UPF1, CPA6, CPB2, CACNB1, SLC31A1, GALNS, CYP51A1, ZBTB26, ATP7B, SLC9A8, NEK3, NT5C, SLC31A2, ACACA, ITGA3, PPARA, ZDHHC23, SETDB2, CYGB, SLC25A13, RNF166, CDH15, RARA, THRA, ZNFX1, MMP28, ZNF618, CA10, LIG3, GLRX2, BSPRY, CA4, MGAT5B, TSHZ2, NR1D1, LHX9, ERBB2, RNF157, PHF11, NPEPL1, BIRC5, SLC39A11, PAPPA, NE…	621	4312	16968	1.16595
GOTERM_MF_ALL	GO:0046914~transition metal ion binding	128	0.1673	0.0151757	STEAP4, PTGS1, B3GALT2, RNF183, ZDHHC7, ZNF652, SALL4, DGKH, UPF1, CPA6, CPB2, SLC31A1, CYP51A1, ZBTB26, ATP7B, SLC31A2, ACACA, PPARA, ZDHHC23, SETDB2, CYGB, RNF166, RARA, THRA, ZNFX1, MMP28, ZNF618, CA10, LIG3, GLRX2, BSPRY, CA4, TSHZ2, NR1D1, LHX9, ERBB2, RNF157, PHF11, NPEPL1, SLC39A11, BIRC5, PAPPA, ZNHIT3, CYP24A1, SP2, RFFL, DGKE, LHX6, QTRTD1, LHX1, TRIM32, PHF19, COX11, SUPT4H1, STEAP2, M…	621	2908	16968	1.20269
GOTERM_MF_ALL	GO:0016299~regulator of G-protein signaling activity	3	0.0039	0.0181314	RGS13, RGS18, PDCL,	621	6	16968	13.6618
GOTERM_MF_ALL	GO:0004693~cyclin-dependent protein kinase activity	5	0.0065	0.0203007	CDK10, CDK3, CDK7, CDK6, CRKRS,	621	29	16968	4.71098
GOTERM_MF_ALL	GO:0022857~transmembrane transporter activity	51	0.0667	0.0216555	ATP6V1A, GABRB1, TSPAN5, SLC7A2, COX4I1, ATP6V1G1, SLC35A5, GABRG1, KCNB1, SLC7A5, CACNB1, SLC31A1, ATP7B, SLC9A8, SLC31A2, SLC16A5, MRPL45, SLC10A4, KCNT2, ATP10D, SLC25A15, GRIN2C, SLC25A13, GABRA4, CACNA1G, COX7B2, ATP5G1, LASP1, NUP85, KCTD2, SLC25A19, TRPC4, ATP9A, ABCC3, GABRA2, SLC9A10, LRCH1, KCNRG, ATP13A1, SLC39A11, CNGA1, SLC30A9, ATP5H, SLC39A8, ATP8A1, ACCN1, COX11, SLC30A5, SLC35B1,…	621	1022	16968	1.36351
GOTERM_MF_ALL	GO:0016887~ATPase activity	22	0.0288	0.0315926	ATP6V1A, PEX1, DDX52, DHX40, ATP5H, ATP9A, DDX49, ABCC3, DDX27, ATP6V1G1, ATP10D, BRIP1, ATP8A1, UPF1, RAD51C, RFC3, ADNP, RAD51L3, ATP13A1, RECQL5, ATP5G1, ATP7B,	621	370	16968	1.62465
GOTERM_MF_ALL	GO:0005375~copper ion transmembrane transporter activity	3	0.0039	0.0322438	SLC31A2, SLC31A1, ATP7B,	621	8	16968	10.2464
GOTERM_MF_ALL	GO:0042625~ATPase activity, coupled to transmembrane movement of ions	9	0.0118	0.0366375	ATP6V1A, ATP8A1, ATP5H, ATP9A, ATP6V1G1, ATP13A1, ATP5G1, ATP10D, ATP7B,	621	104	16968	2.36455
GOTERM_MF_ALL	GO:0015075~ion transmembrane transporter activity	40	0.0523	0.0407716	ATP6V1A, GABRB1, TSPAN5, KCTD2, TRPC4, ATP9A, COX4I1, ABCC3, GABRA2, ATP6V1G1, GABRG1, SLC9A10, KCNB1, CACNB1, SLC31A1, ATP13A1, KCNRG, ATP7B, SLC9A8, SLC39A11, SLC31A2, CNGA1, SLC30A9, ATP5H, SLC39A8, SLC10A4, KCNT2, ATP10D, GRIN2C, ATP8A1, GABRA4, CACNA1G, ACCN1, COX7B2, COX11, SLC30A5, KCTD4, KCNG1, LASP1, ATP5G1,	621	800	16968	1.36618
GOTERM_MF_ALL	GO:0043169~cation binding	166	0.217	0.0416973	CELSR1, STEAP4, PTGS1, B3GALT2, RNF183, ITGA4, ZDHHC7, SALL4, ZNF652, DGKH, UPF1, CPA6, CPB2, CACNB1, SLC31A1, GALNS, CYP51A1, ZBTB26, ATP7B, SLC9A8, SLC31A2, ACACA, ITGA3, PPARA, ZDHHC23, SETDB2, CYGB, SLC25A13, RNF166, CDH15, RARA, THRA, ZNFX1, MMP28, ZNF618, CA10, LIG3, GLRX2, BSPRY, CA4, TSHZ2, NR1D1, LHX9, ERBB2, RNF157, PHF11, NPEPL1, BIRC5, SLC39A11, PAPPA, ZNHIT3, SVEP1, CYP24A1, SP2, RFF…	621	4006	16968	1.13223
GOTERM_MF_ALL	GO:0003924~GTPase activity	14	0.0183	0.0484296	SEPT4, GNG10, GNG11, RAB22A, TRIM23, TUBB1, TUBB3, GTPBP1, GNAT1, RAB14, GNAS, GUF1, RIT2, GNGT2,	621	212	16968	1.80439
GOTERM_MF_ALL	GO:0016820~hydrolase activity, acting on acid anhydrides, catalyzing transmembrane movement of substances	11	0.0144	0.0486834	ATP6V1A, ATP8A1, ATP5H, ATP9A, ABCC3, KIAA0195, ATP6V1G1, ATP13A1, ATP5G1, ATP10D, ATP7B,	621	150	16968	2.00374
GOTERM_MF_ALL	GO:0004890~GABA-A receptor activity	4	0.0052	0.0499622	GABRB1, GABRG1, GABRA4, GABRA2,	621	23	16968	4.75194
GOTERM_MF_ALL	GO:0015405~P-P-bond-hydrolysis-driven transmembrane transporter activity	11	0.0144	0.0583045	ATP6V1A, ATP8A1, ATP5H, MRPL45, ATP9A, ABCC3, ATP6V1G1, ATP13A1, ATP5G1, ATP10D, ATP7B,	621	155	16968	1.9391
GOTERM_MF_ALL	GO:0015399~primary active transmembrane transporter activity	11	0.0144	0.0583045	ATP6V1A, ATP8A1, ATP5H, MRPL45, ATP9A, ABCC3, ATP6V1G1, ATP13A1, ATP5G1, ATP10D, ATP7B,	621	155	16968	1.9391
GOTERM_MF_ALL	GO:0046915~transition metal ion transmembrane transporter activity	4	0.0052	0.0615314	SLC31A2, SLC30A5, SLC31A1, ATP7B,	621	25	16968	4.37179
GOTERM_MF_ALL	GO:0022890~inorganic cation transmembrane transporter activity	13	0.017	0.0656238	ATP6V1A, SLC9A8, TSPAN5, SLC31A2, ATP5H, COX4I1, ATP6V1G1, COX11, COX7B2, SLC30A5, SLC31A1, ATP7B, ATP5G1,	621	201	16968	1.7672
GOTERM_MF_ALL	GO:0004601~peroxidase activity	5	0.0065	0.0662648	CYGB, MPO, PTGS1, EPX, LPO,	621	42	16968	3.25282
GOTERM_MF_ALL	GO:0016684~oxidoreductase activity, acting on peroxide as acceptor	5	0.0065	0.0662648	CYGB, MPO, PTGS1, EPX, LPO,	621	42	16968	3.25282
GOTERM_MF_ALL	GO:0004673~protein histidine kinase activity	4	0.0052	0.0677412	C20orf32, PDK3, PDK2, PDK4,	621	26	16968	4.20364
GOTERM_MF_ALL	GO:0001664~G-protein-coupled receptor binding	7	0.0092	0.0687942	CCL2, CCL14, GNAS, CCL5, SLC9A3R1, C5, CCL1,	621	79	16968	2.42108
GOTERM_MF_ALL	GO:0009053~electron donor activity	2	0.0026	0.0717457	ACOX1, GLRX2,	621	2	16968	27.3237
GOTERM_MF_ALL	GO:0004063~aryldialkylphosphatase activity	2	0.0026	0.0717457	PON1, PON2,	621	2	16968	27.3237
GOTERM_MF_ALL	GO:0016917~GABA receptor activity	4	0.0052	0.0742236	GABRB1, GABRG1, GABRA4, GABRA2,	621	27	16968	4.04795
GOTERM_MF_ALL	GO:0042626~ATPase activity, coupled to transmembrane movement of substances	10	0.0131	0.0764477	ATP6V1A, ATP8A1, ATP5H, ATP9A, ABCC3, ATP6V1G1, ATP13A1, ATP5G1, ATP10D, ATP7B,	621	142	16968	1.9242
GOTERM_MF_ALL	GO:0042578~phosphoric ester hydrolase activity	19	0.0248	0.0774136	CALCR, NT5C, DAPP1, DUSP14, PTPN1, PDE1A, PPM1D, PON2, MTMR7, PPM1E, PLCXD2, GDPD1, PPP3CA, PON1, PDE7A, HDHD3, DUSP19, PHOSPHO1, PDE11A,	621	341	16968	1.52243
GOTERM_MF_ALL	GO:0043492~ATPase activity, coupled to movement of substances	10	0.0131	0.0790907	ATP6V1A, ATP8A1, ATP5H, ATP9A, ABCC3, ATP6V1G1, ATP13A1, ATP5G1, ATP10D, ATP7B,	621	143	16968	1.91075
GOTERM_MF_ALL	GO:0008238~exopeptidase activity	8	0.0105	0.0797986	SCRN2, UCHL1, CPA6, SCPEP1, METAP1, CPB2, DPEP1, NPEPL1,	621	102	16968	2.14303
GOTERM_MF_ALL	GO:0004864~protein phosphatase inhibitor activity	4	0.0052	0.0809695	C13orf18, PPP1R1B, PPP1R1C, PPP1R9B,	621	28	16968	3.90338
GOTERM_MF_ALL	GO:0022834~ligand-gated channel activity	8	0.0105	0.0864245	GRIN2C, GABRB1, GABRG1, CNGA1, GABRA4, TRPC4, ACCN1, GABRA2,	621	104	16968	2.10182
GOTERM_MF_ALL	GO:0015276~ligand-gated ion channel activity	8	0.0105	0.0864245	GRIN2C, GABRB1, GABRG1, CNGA1, GABRA4, TRPC4, ACCN1, GABRA2,	621	104	16968	2.10182
GOTERM_MF_ALL	GO:0005548~phospholipid transporter activity	4	0.0052	0.0879697	ATP8A1, PCTP, ATP9A, ATP10D,	621	29	16968	3.76878
GOTERM_MF_ALL	GO:0020037~heme binding	10	0.0131	0.0931295	CYGB, MPO, CYBA, CYP7B1, PTGS1, CYP24A1, EPX, PTGIS, CYP51A1, LPO,	621	148	16968	1.84619
GOTERM_MF_ALL	GO:0046906~tetrapyrrole binding	10	0.0131	0.0931295	CYGB, MPO, CYBA, CYP7B1, PTGS1, CYP24A1, EPX, PTGIS, CYP51A1, LPO,	621	148	16968	1.84619
GOTERM_MF_ALL	GO:0015662~ATPase activity, coupled to transmembrane movement of ions, phosphorylative mechanism	6	0.0078	0.0931682	ATP8A1, ATP9A, ATP6V1G1, ATP13A1, ATP10D, ATP7B,	621	66	16968	2.48397
GOTERM_MF_ALL	GO:0016775~phosphotransferase activity, nitrogenous group as acceptor	4	0.0052	0.0952146	C20orf32, PDK3, PDK2, PDK4,	621	30	16968	3.64316
GOTERM_MF_ALL	GO:0019212~phosphatase inhibitor activity	4	0.0052	0.0952146	C13orf18, PPP1R1B, PPP1R1C, PPP1R9B,	621	30	16968	3.64316
KEGG_PATHWAY	hsa00940:Phenylpropanoid biosynthesis	3	0.0039	0.0317145	MPO, EPX, LPO,	177	7	4214	10.2034
KEGG_PATHWAY	hsa00680:Methane metabolism	3	0.0039	0.0626071	MPO, EPX, LPO,	177	10	4214	7.14237
KEGG_PATHWAY	hsa04512:ECM-receptor interaction	8	0.0105	0.073233	TNC, ITGB4, ITGAV, COL1A2, ITGA3, FNDC3A, ITGA4, CHAD,	177	88	4214	2.16436
KEGG_PATHWAY	hsa05221:Acute myeloid leukemia	6	0.0078	0.0778379	RPS6KB1, CCNA1, RARA, PIK3R1, NFKB1, GRB2,	177	55	4214	2.59723
