# Supplementary material for: A Genome Scan for Positive Selection in Thoroughbred Horses
Source: PLoS One. 2009 Jun 2;4(6):e5767. doi: 10.1371/journal.pone.0005767 (PMC2685479; doi:10.1371/journal.pone.0005767)
Supplement: Table S3 — Full list of gene ontologies overrepresented in selected regions (2). The on-line functional annotation bioinformatics tool DAVID (david.abcc.ncifcrf.gov) was used to search for gene ontology (GO) terms that were overrepresented among genes in selected regions. Selected regions were defined by the nine high FST regions that had significant (P<0.05) reductions in Thoroughbred heterozygosity. The table shows the GO category (BP: Biological process; MF: Molecular function; CC: Cellular compartment; and KEGG pathway), GO functional term (Term), number of genes in each GO category (Count), proportion of the total number of genes in list in that GO category (%), significance of over-representation (P-value), the names of genes within each GO category (Genes), the total number of genes in the selected regions list (List total), the number of genes with GO term in the database (Pop hits), the total number of genes in the database (Pop total) and the fold enrichment (Fold change). (0.08 MB XLS) [file pone.0005767.s003.xls]

## Sheet: Sheet1
Category	Term	Count	%	PValue	Genes	List Total	Pop Hits	Pop Total	Fold Change
GOTERM_BP_ALL	GO:0009987~cellular process	335	0.7053	0.000223369	OR1L3, TNFSF8, SNX30, PTGS1, PCTP, RNASEL, FASLG, OR1L1, SLC25A30, ASNS, ATP6V1G1, PNPO, ZNF652, PAPPA2, COL1A2, RFWD2, CPB2, PSMB3, MRRF, ZBTB26, CYP51A1, NEK3, ABL2, DEFA5, OR1J2, ITGA3, MRPL27, GLT25D2, CDK5RAP3, CCR7, SETDB2, MRPL10, DEFB103A, RASL10B, CDK6, LXN, NLE1, MMP28, ZNF618, ATP5G1, ASB5, SCRN2, GNG10, CA4, ANGPT2, OSBPL7, UNC45B, CCL13, GDPD1, UBE2Z, STRBP, RPL7A, SNF8, MRPS14, AGPA…	369	12970	15360	1.07515
GOTERM_BP_ALL	GO:0030154~cell differentiation	65	0.1368	0.00123129	HOXB5, TLR4, TNFSF8, MYCBPAP, PTGS1, RC3H1, LECT1, FASLG, C1GALT1, MMD, CSF3, PAPPA2, NEUROD2, UTP14C, FZD1, C5, HTR2A, SEPT4, CDK5RAP2, ITGA3, CDK5RAP3, SOCS7, PPP1R9A, TNR, IL12A, DBC1, RB1, RPS6KB1, CDK6, PPP1R9B, NLE1, AATF, PHB, TOB1, ANGPT2, DLX5, C17orf47, UNC45B, TNC, UBE2Z, ERBB2, TNFSF18, NGFR, HRB, TUBD1, STRBP, VEGFC, CCL2, ACVR2A, MPO, PAPPA, TNN, TNS4, RFFL, TRAF1, SPATA4, COL4A4, D…	369	1835	15360	1.47449
GOTERM_BP_ALL	GO:0048869~cellular developmental process	65	0.1368	0.00123129	HOXB5, TLR4, TNFSF8, MYCBPAP, PTGS1, RC3H1, LECT1, FASLG, C1GALT1, MMD, CSF3, PAPPA2, NEUROD2, UTP14C, FZD1, C5, HTR2A, SEPT4, CDK5RAP2, ITGA3, CDK5RAP3, SOCS7, PPP1R9A, TNR, IL12A, DBC1, RB1, RPS6KB1, CDK6, PPP1R9B, NLE1, AATF, PHB, TOB1, ANGPT2, DLX5, C17orf47, UNC45B, TNC, UBE2Z, ERBB2, TNFSF18, NGFR, HRB, TUBD1, STRBP, VEGFC, CCL2, ACVR2A, MPO, PAPPA, TNN, TNS4, RFFL, TRAF1, SPATA4, COL4A4, D…	369	1835	15360	1.47449
GOTERM_BP_ALL	GO:0046907~intracellular transport	31	0.0653	0.002067	PEX1, DYNC1I1, PEX12, TOB1, KPNA3, RPL23, SLC25A30, STARD3, KIF5C, STX6, COPZ2, STXBP4, HRB, TUBD1, KPNB1, APPBP2, ATP7B, AP2B1, MRPL45, SMG7, RFFL, AP1GBP1, KPNA4, SLC25A15, KIF2B, KIF12, RAB14, BET1, NBEA, COG3, CLTC,	369	714	15360	1.80729
GOTERM_BP_ALL	GO:0032502~developmental process	101	0.2126	0.00361366	TNFSF8, PTGS1, LECT1, FASLG, MMD, PAPPA2, COL1A2, ROD1, C5, ITGA3, ARHGAP15, CDK5RAP3, IL12A, DBC1, LAMC2, CDK6, IGFBP4, NLE1, CA10, LIG3, ANGPT2, UNC45B, UBE2Z, ERBB2, STRBP, VEGFC, CCL2, PAPPA, TNN, TBX4, TNS4, RFFL, COL4A4, SPATA4, CHAD, MAB21L1, LHX6, DNER, ITM2B, HOXB1, HOXB7, ALG5, LHX1, ACCN1, POSTN, HOXB5, TLR4, MYCBPAP, HLF, RC3H1, C1GALT1, CSF3, MUSK, NEUROD2, UTP14C, DLX6, FZD1, HTR2A,…	369	3262	15360	1.28885
GOTERM_BP_ALL	GO:0007283~spermatogenesis	13	0.0274	0.0068175	ACVR2A, LIG3, MYCBPAP, CCNA1, C17orf47, SPATA4, CCT6B, HRB, SPAG9, UTP14C, TUBD1, STRBP, SPATA20,	369	220	15360	2.45972
GOTERM_BP_ALL	GO:0048232~male gamete generation	13	0.0274	0.0068175	ACVR2A, LIG3, MYCBPAP, CCNA1, C17orf47, SPATA4, CCT6B, HRB, SPAG9, UTP14C, TUBD1, STRBP, SPATA20,	369	220	15360	2.45972
GOTERM_BP_ALL	GO:0055074~calcium ion homeostasis	9	0.0189	0.00867082	CCL2, CCL13, CCL14, CCL5, CCL1, TAC1, CCR7, ATP7B, EDG2,	369	121	15360	3.09615
GOTERM_BP_ALL	GO:0006874~cellular calcium ion homeostasis	9	0.0189	0.00867082	CCL2, CCL13, CCL14, CCL5, CCL1, TAC1, CCR7, ATP7B, EDG2,	369	121	15360	3.09615
GOTERM_BP_ALL	GO:0006779~porphyrin biosynthetic process	4	0.0084	0.0099395	SUCLA2, NFE2L1, ALAD, RSAD1,	369	19	15360	8.76337
GOTERM_BP_ALL	GO:0033014~tetrapyrrole biosynthetic process	4	0.0084	0.0099395	SUCLA2, NFE2L1, ALAD, RSAD1,	369	19	15360	8.76337
GOTERM_BP_ALL	GO:0051649~establishment of cellular localization	33	0.0695	0.0123428	PEX1, DYNC1I1, PEX12, TOB1, KPNA3, RPL23, SLC25A30, STARD3, KIF5C, STX6, COPZ2, STXBP4, HRB, TUBD1, CCL5, KPNB1, HTR2A, APPBP2, ATP7B, AP2B1, MRPL45, SMG7, RFFL, AP1GBP1, KPNA4, SLC25A15, KIF2B, KIF12, RAB14, BET1, NBEA, COG3, CLTC,	369	881	15360	1.5592
GOTERM_BP_ALL	GO:0019953~sexual reproduction	16	0.0337	0.0128981	ACVR2A, SPACA3, LIG3, MYCBPAP, CCNA1, SPATA4, C17orf47, CCT6B, RPS6KB1, UTP14C, HRB, SPAG9, TUBD1, STRBP, ZPBP2, SPATA20,	369	328	15360	2.03054
GOTERM_BP_ALL	GO:0032501~multicellular organismal process	110	0.2316	0.0129906	OR1L3, PTGS1, LECT1, OR1L1, COL1A2, C5, CACNB1, ATP7B, OR1J2, ITGA3, CDK5RAP3, IL12A, DFNB31, PPP1R1B, LAMC2, CDK6, LXN, IGFBP4, NLE1, OR2K2, CA10, LIG3, CA4, ANGPT2, RGS16, UNC45B, PDCL, ERBB2, STRBP, OR5C1, VEGFC, CCL2, TNN, TBX4, CACNA1E, COL4A4, MAB21L1, LHX6, DNER, ITM2B, HOXB1, HOXB7, ALG5, LHX1, ACCN1, CRB2, COX11, POSTN, OR1N1, GNGT2, HOXB5, TLR4, MYCBPAP, HLF, RC3H1, C1GALT1, OR13G1, CSF…	369	3759	15360	1.21811
GOTERM_BP_ALL	GO:0055065~metal ion homeostasis	9	0.0189	0.0130288	CCL2, CCL13, CCL14, CCL5, CCL1, TAC1, CCR7, ATP7B, EDG2,	369	130	15360	2.8818
GOTERM_BP_ALL	GO:0006875~cellular metal ion homeostasis	9	0.0189	0.0130288	CCL2, CCL13, CCL14, CCL5, CCL1, TAC1, CCR7, ATP7B, EDG2,	369	130	15360	2.8818
GOTERM_BP_ALL	GO:0050830~defense response to Gram-positive bacterium	3	0.0063	0.0145678	SPACA3, DEFB103A, IL12A,	369	8	15360	15.6098
GOTERM_BP_ALL	GO:0007275~multicellular organismal development	73	0.1537	0.0148184	HOXB5, TLR4, MYCBPAP, HLF, LECT1, RC3H1, C1GALT1, CSF3, MUSK, NEUROD2, DLX6, UTP14C, COL1A2, FZD1, HTR2A, CDK5RAP2, ITGA3, CDK5RAP3, PPP1R9A, TNR, HOXB13, RB1, RAPGEFL1, LAMC2, CDK6, PPP1R9B, CCDC16, HOXB6, IGFBP4, NLE1, SGCE, CALCR, CA10, LIG3, TOB1, DLX5, ANGPT2, C17orf47, PLXDC1, HOXB3, UNC45B, TNC, ERBB2, PCGF2, NGFR, HRB, SGCA, HOXB2, TUBD1, STRBP, VEGFC, CCL2, ACVR2A, TNN, DLX3, TBX4, COL4A…	369	2349	15360	1.29361
GOTERM_BP_ALL	GO:0007276~gamete generation	14	0.0295	0.0154922	ACVR2A, LIG3, MYCBPAP, CCNA1, C17orf47, SPATA4, CCT6B, RPS6KB1, HRB, SPAG9, UTP14C, TUBD1, STRBP, SPATA20,	369	275	15360	2.11914
GOTERM_BP_ALL	GO:0051641~cellular localization	33	0.0695	0.0182834	PEX1, DYNC1I1, PEX12, TOB1, KPNA3, RPL23, SLC25A30, STARD3, KIF5C, STX6, COPZ2, STXBP4, HRB, TUBD1, CCL5, KPNB1, HTR2A, APPBP2, ATP7B, AP2B1, MRPL45, SMG7, RFFL, AP1GBP1, KPNA4, SLC25A15, KIF2B, KIF12, RAB14, BET1, NBEA, COG3, CLTC,	369	906	15360	1.51618
GOTERM_BP_ALL	GO:0006778~porphyrin metabolic process	4	0.0084	0.0190128	SUCLA2, NFE2L1, ALAD, RSAD1,	369	24	15360	6.93767
GOTERM_BP_ALL	GO:0033013~tetrapyrrole metabolic process	4	0.0084	0.0190128	SUCLA2, NFE2L1, ALAD, RSAD1,	369	24	15360	6.93767
GOTERM_BP_ALL	GO:0009582~detection of abiotic stimulus	5	0.0105	0.0191831	GNAT1, NGFR, LXN, TAC1, GNGT2,	369	43	15360	4.84023
GOTERM_BP_ALL	GO:0048856~anatomical structure development	67	0.1411	0.0194572	HOXB5, TLR4, LECT1, RC3H1, C1GALT1, CSF3, MUSK, PAPPA2, NEUROD2, DLX6, COL1A2, ROD1, FZD1, HTR2A, CDK5RAP2, ITGA3, ARHGAP15, CDK5RAP3, SOCS7, PPP1R9A, TNR, HOXB13, RB1, RAPGEFL1, LAMC2, CDK6, PPP1R9B, CCDC16, IGFBP4, NLE1, SGCE, CALCR, CA10, LIG3, TOB1, ANGPT2, DLX5, C17orf47, PLXDC1, HOXB3, UNC45B, TNC, ERBB2, NGFR, HRB, SGCA, VEGFC, CCL2, NFE2L1, ACVR2A, TNN, DLX3, TBX4, COL4A4, CHAD, MAB21L1, …	369	2153	15360	1.29538
GOTERM_BP_ALL	GO:0000003~reproduction	22	0.0463	0.0215942	CCL2, ACVR2A, SPACA3, PAPPA, LIG3, MYCBPAP, CCNA1, SPATA4, C17orf47, CCT6B, RPS6KB1, PPP1R1B, UTP14C, HRB, SPAG9, TUBD1, STRBP, COX11, ZPBP2, SPATA20, TAC1, ATP7B,	369	543	15360	1.68651
GOTERM_BP_ALL	GO:0001501~skeletal development	12	0.0253	0.0217335	ACVR2A, CALCR, DLX3, DLX6, COL1A2, TOB1, TBX4, LECT1, CDK6, DLX5, POSTN, IGFBP4,	369	228	15360	2.19084
GOTERM_BP_ALL	GO:0043549~regulation of kinase activity	12	0.0253	0.0271721	RB1, TNFSF15, DGKH, ERBB2, CCNA1, RGS3, CDK5RAP3, DGKE, C5, CDC6, HTR2A, IRS1,	369	236	15360	2.11658
GOTERM_BP_ALL	GO:0009581~detection of external stimulus	5	0.0105	0.0275747	TLR4, GNAT1, NGFR, LXN, GNGT2,	369	48	15360	4.33604
GOTERM_BP_ALL	GO:0048646~anatomical structure formation	10	0.0211	0.028698	ERBB2, LHX1, HRB, TBX4, LECT1, ANGPT2, C1GALT1, NLE1, PLXDC1, VEGFC,	369	179	15360	2.32548
GOTERM_BP_ALL	GO:0051338~regulation of transferase activity	12	0.0253	0.0309374	RB1, TNFSF15, DGKH, ERBB2, CCNA1, RGS3, CDK5RAP3, DGKE, C5, CDC6, HTR2A, IRS1,	369	241	15360	2.07266
GOTERM_BP_ALL	GO:0006825~copper ion transport	3	0.0063	0.0322388	SLC31A2, SLC31A1, ATP7B,	369	12	15360	10.4065
GOTERM_BP_ALL	GO:0042744~hydrogen peroxide catabolic process	3	0.0063	0.0322388	MPO, EPX, LPO,	369	12	15360	10.4065
GOTERM_BP_ALL	GO:0048513~organ development	42	0.0884	0.0345261	CALCR, CA10, TLR4, TOB1, LECT1, RC3H1, DLX5, ANGPT2, C1GALT1, C17orf47, PLXDC1, HOXB3, UNC45B, TNC, CSF3, MUSK, ERBB2, NGFR, DLX6, COL1A2, SGCA, VEGFC, CCL2, ACVR2A, CDK5RAP2, DLX3, TBX4, CDK5RAP3, COL4A4, HOXB13, DNER, LHX6, RB1, FOXO1A, LHX1, LAMC2, CDK6, TNFSF11, POSTN, IGFBP4, UGCG, SGCE,	369	1282	15360	1.36372
GOTERM_BP_ALL	GO:0006886~intracellular protein transport	17	0.0358	0.0352816	AP2B1, PEX1, MRPL45, PEX12, TOB1, KPNA3, RFFL, RPL23, AP1GBP1, KPNA4, STX6, COPZ2, STXBP4, COG3, KPNB1, CLTC, APPBP2,	369	405	15360	1.74726
GOTERM_BP_ALL	GO:0016043~cellular component organization and biogenesis	80	0.1684	0.0357556	MYST2, PEX1, DYNC1I1, STOM, RPL23, SLC25A30, STARD3, KIF5C, STX6, COPZ2, PAPPA2, STXBP4, UTP14C, HTR2A, APPBP2, ATP7B, SMARCE1, ABL2, MRPL45, TCAP, ARHGAP15, PPP1R9A, SOCS7, TNR, KPNA4, SLC25A15, GSN, SETDB2, MED4, RB1, EPC2, PPP1R9B, IGFBP4, SFRS1, CLTC, LASP1, PHB, EXOSC8, TOB1, PEX12, DLX5, KPNA3, C17orf47, CCT6B, TNC, PCGF2, NGFR, HRB, TUBD1, CCL5, MTRF1, RPL7A, KPNB1, DNM3, KLHL20, SPACA3, A…	369	2723	15360	1.22295
GOTERM_BP_ALL	GO:0009617~response to bacterium	7	0.0147	0.0359007	DEFA1, DEFA3, SPACA3, DEFB103A, DEFA5, PPM1D, CCL20, IL12A,	369	102	15360	2.85669
GOTERM_BP_ALL	GO:0006607~NLS-bearing substrate import into nucleus	3	0.0063	0.0375071	KPNB1, KPNA3, KPNA4,	369	13	15360	9.606
GOTERM_BP_ALL	GO:0045667~regulation of osteoblast differentiation	3	0.0063	0.0375071	TOB1, CDK6, DLX5,	369	13	15360	9.606
GOTERM_BP_ALL	GO:0045595~regulation of cell differentiation	9	0.0189	0.0377904	ACVR2A, RB1, TLR4, CDK5RAP2, TOB1, RC3H1, CDK6, DLX5, CDK5RAP3,	369	159	15360	2.35619
GOTERM_BP_ALL	GO:0030005~cellular di-, tri-valent inorganic cation homeostasis	9	0.0189	0.0389874	CCL2, CCL13, CCL14, CCL5, CCL1, TAC1, CCR7, ATP7B, EDG2,	369	160	15360	2.34146
GOTERM_BP_ALL	GO:0051606~detection of stimulus	6	0.0126	0.0391496	TLR4, GNAT1, NGFR, LXN, TAC1, GNGT2,	369	78	15360	3.202
GOTERM_BP_ALL	GO:0055066~di-, tri-valent inorganic cation homeostasis	9	0.0189	0.0402096	CCL2, CCL13, CCL14, CCL5, CCL1, TAC1, CCR7, ATP7B, EDG2,	369	161	15360	2.32692
GOTERM_BP_ALL	GO:0042743~hydrogen peroxide metabolic process	3	0.0063	0.0430784	MPO, EPX, LPO,	369	14	15360	8.91986
GOTERM_BP_ALL	GO:0007618~mating	3	0.0063	0.0430784	ACVR2A, PPP1R1B, TAC1,	369	14	15360	8.91986
GOTERM_BP_ALL	GO:0051188~cofactor biosynthetic process	8	0.0168	0.0438999	SUCLA2, NFE2L1, KYNU, ALAD, ATP6V1G1, NMNAT2, RSAD1, ATP5G1,	369	135	15360	2.46673
GOTERM_BP_ALL	GO:0007169~transmembrane receptor protein tyrosine kinase signaling pathway	10	0.0211	0.0441904	MUSK, FOXO1A, ERBB2, STXBP4, COL1A2, GRB7, LECT1, SOCS7, IRS1, VEGFC,	369	194	15360	2.14567
GOTERM_BP_ALL	GO:0050790~regulation of catalytic activity	19	0.04	0.0469564	CALCR, ACVR2A, ABL2, C13orf18, CCNA1, RGS3, CDK5RAP3, DGKE, CDC6, RB1, TNFSF15, DGKH, ERBB2, HRB, C5, RABGAP1, HTR2A, IRS1, EDG2,	369	488	15360	1.62069
GOTERM_BP_ALL	GO:0017038~protein import	7	0.0147	0.0488758	PEX1, TOB1, PEX12, KPNB1, KPNA3, RPL23, KPNA4,	369	110	15360	2.64893
GOTERM_BP_ALL	GO:0045859~regulation of protein kinase activity	11	0.0232	0.0505774	RB1, TNFSF15, DGKH, ERBB2, CCNA1, RGS3, CDK5RAP3, DGKE, C5, CDC6, HTR2A,	369	230	15360	1.99081
GOTERM_BP_ALL	GO:0046483~heterocycle metabolic process	6	0.0126	0.0510948	SUCLA2, NFE2L1, P4HA1, KYNU, ALAD, RSAD1,	369	84	15360	2.97329
GOTERM_BP_ALL	GO:0008286~insulin receptor signaling pathway	4	0.0084	0.0544336	FOXO1A, STXBP4, SOCS7, IRS1,	369	36	15360	4.62511
GOTERM_BP_ALL	GO:0002573~myeloid leukocyte differentiation	4	0.0084	0.0621352	CSF3, RB1, TLR4, TNFSF11,	369	38	15360	4.38169
GOTERM_BP_ALL	GO:0045637~regulation of myeloid cell differentiation	4	0.0084	0.0621352	ACVR2A, RB1, TLR4, CDK6,	369	38	15360	4.38169
GOTERM_BP_ALL	GO:0007517~muscle development	9	0.0189	0.0632983	TNC, RB1, MUSK, NGFR, SGCA, COL4A4, UNC45B, SGCE, DNER,	369	177	15360	2.11658
GOTERM_BP_ALL	GO:0030099~myeloid cell differentiation	6	0.0126	0.0649514	CSF3, ACVR2A, RB1, TLR4, CDK6, TNFSF11,	369	90	15360	2.77507
GOTERM_BP_ALL	GO:0042742~defense response to bacterium	6	0.0126	0.0674464	DEFA1, DEFA3, SPACA3, DEFB103A, DEFA5, CCL20, IL12A,	369	91	15360	2.74457
GOTERM_BP_ALL	GO:0042330~taxis	8	0.0168	0.0674658	CCL2, DEFA1, DEFA3, CCL13, CCL5, CCL20, C5, CCL1, CCR7,	369	149	15360	2.23495
GOTERM_BP_ALL	GO:0006935~chemotaxis	8	0.0168	0.0674658	CCL2, DEFA1, DEFA3, CCL13, CCL5, CCL20, C5, CCL1, CCR7,	369	149	15360	2.23495
GOTERM_BP_ALL	GO:0009620~response to fungus	3	0.0063	0.0680535	DEFA1, DEFA3, TLR4, DEFA5,	369	18	15360	6.93767
GOTERM_BP_ALL	GO:0030003~cellular cation homeostasis	9	0.0189	0.0701401	CCL2, CCL13, CCL14, CCL5, CCL1, TAC1, CCR7, ATP7B, EDG2,	369	181	15360	2.0698
GOTERM_BP_ALL	GO:0006610~ribosomal protein import into nucleus	2	0.0042	0.0701712	KPNB1, RPL23,	369	3	15360	27.7507
GOTERM_BP_ALL	GO:0055080~cation homeostasis	9	0.0189	0.0719186	CCL2, CCL13, CCL14, CCL5, CCL1, TAC1, CCR7, ATP7B, EDG2,	369	182	15360	2.05843
GOTERM_BP_ALL	GO:0048468~cell development	39	0.0821	0.0738385	PHB, TNFSF8, DLX5, FASLG, C17orf47, MMD, TNC, UBE2Z, TNFSF18, NEUROD2, NGFR, HRB, C5, HTR2A, VEGFC, CCL2, MPO, SEPT4, CDK5RAP2, TNN, ITGA3, TNS4, CDK5RAP3, RFFL, TRAF1, SPATA4, COL4A4, TNR, IL12A, DBC1, DNER, CKAP2, RPS6KB1, FOXO1A, TNFSF15, PTRH2, CDK6, PPP1R9B, AATF,	369	1245	15360	1.30395
GOTERM_BP_ALL	GO:0033036~macromolecule localization	28	0.0589	0.0738753	PEX1, SNX30, PEX12, TOB1, SNX11, KPNA3, RPL23, COPZ2, STX6, VPS36, STXBP4, HRB, KPNB1, CASC3, APPBP2, SNF8, AP2B1, MRPL45, SMG7, RFFL, AP1GBP1, KPNA4, RAB14, BET1, COG6, NBEA, COG3, CLTC,	369	840	15360	1.38753
GOTERM_BP_ALL	GO:0015031~protein transport	24	0.0505	0.0760298	AP2B1, PEX1, SNX30, MRPL45, TOB1, PEX12, SNX11, KPNA3, RFFL, RPL23, AP1GBP1, KPNA4, STX6, COPZ2, VPS36, STXBP4, RAB14, BET1, COG6, COG3, KPNB1, CLTC, APPBP2, SNF8,	369	697	15360	1.43332
GOTERM_BP_ALL	GO:0018193~peptidyl-amino acid modification	7	0.0147	0.0777563	ABL2, ABI3, P4HA1, IL12A, PDK2, NARG1L, PDK4,	369	124	15360	2.34986
GOTERM_BP_ALL	GO:0006979~response to oxidative stress	6	0.0126	0.0807071	MPO, PTGS1, CCL5, EPX, PRDX6, LPO,	369	96	15360	2.60163
GOTERM_BP_ALL	GO:0042542~response to hydrogen peroxide	3	0.0063	0.081935	MPO, EPX, LPO,	369	20	15360	6.2439
GOTERM_BP_ALL	GO:0007167~enzyme linked receptor protein signaling pathway	12	0.0253	0.0819553	ACVR2A, MUSK, FOXO1A, ERBB2, STXBP4, COL1A2, TOB1, GRB7, LECT1, SOCS7, IRS1, VEGFC,	369	285	15360	1.75267
GOTERM_BP_ALL	GO:0007015~actin filament organization	4	0.0084	0.0834291	ABL2, PPP1R9B, LCP1, PPP1R9A,	369	43	15360	3.87219
GOTERM_BP_ALL	GO:0000279~M phase	12	0.0253	0.0852218	RB1, NEK3, LIG3, KIF2B, SUGT1, UTP14C, CCNA1, PPP1R9B, CCDC16, RAD51L3, CDC6, CDC26,	369	287	15360	1.74046
GOTERM_BP_ALL	GO:0022403~cell cycle phase	14	0.0295	0.0869416	NEK3, LIG3, SUGT1, CCNA1, PPM1D, CDC6, RB1, KIF2B, UTP14C, CDK6, PPP1R9B, CCDC16, RAD51L3, CDC26,	369	356	15360	1.63698
GOTERM_BP_ALL	GO:0048731~system development	52	0.1095	0.0883182	TLR4, RC3H1, LECT1, C1GALT1, CSF3, MUSK, NEUROD2, COL1A2, DLX6, CDK5RAP2, ITGA3, CDK5RAP3, PPP1R9A, TNR, HOXB13, RB1, RAPGEFL1, LAMC2, CDK6, PPP1R9B, IGFBP4, SGCE, CALCR, CA10, LIG3, TOB1, ANGPT2, DLX5, C17orf47, PLXDC1, HOXB3, UNC45B, TNC, ERBB2, NGFR, SGCA, VEGFC, ACVR2A, CCL2, DLX3, TNN, TBX4, COL4A4, LHX6, DNER, ITM2B, FOXO1A, LHX1, ACCN1, TNFSF11, POSTN, UGCG,	369	1760	15360	1.22986
GOTERM_BP_ALL	GO:0042364~water-soluble vitamin biosynthetic process	3	0.0063	0.0891735	KYNU, NMNAT2, PNPO,	369	21	15360	5.94657
GOTERM_BP_ALL	GO:0016048~detection of temperature stimulus	2	0.0042	0.0924527	NGFR, LXN,	369	4	15360	20.813
GOTERM_BP_ALL	GO:0050793~regulation of developmental process	11	0.0232	0.0951469	ACVR2A, RB1, TLR4, CDK5RAP2, NGFR, TOB1, RC3H1, CDK6, DLX5, CDK5RAP3, ARHGAP15,	369	259	15360	1.7679
GOTERM_BP_ALL	GO:0006800~oxygen and reactive oxygen species metabolic process	4	0.0084	0.097505	MPO, NCF2, EPX, LPO,	369	46	15360	3.61965
GOTERM_CC_ALL	GO:0044421~extracellular region part	37	0.0779	0.000338726	TNFSF8, LECT1, ANGPT2, CCL20, FASLG, TFPI2, TNC, CCL13, CSF3, TNFSF18, COL1A2, SGCA, CCL5, C5, CPB2, CCL1, TAC1, CCL2, PAPPA, CCL14, TNN, TNFSF4, COL4A4, TNR, IL12A, CHAD, TNFSF15, ANGPTL1, PON1, OLFM4, LAMC2, TNFSF11, POSTN, MMP28, UGCG, FREM2, SGCE,	381	819	15857	1.88024
GOTERM_CC_ALL	GO:0005737~cytoplasm	180	0.3789	0.000941443	SAMD9, MRPS31, PTGS1, CEP350, PCTP, LECT1, RNASEL, ATAD4, SLC25A30, STARD3, ATP6V1G1, MMD, DGKH, COL1A2, RFWD2, HDHD3, TMEM49, PSMB3, IGF2BP1, MRRF, ATP7B, ACN9, ABL2, ACACA, MRPL27, GLT25D2, CEP110, KPNA4, DFNB31, DBC1, SLC25A13, MRPL10, IFT80, PPP1R1B, PSMD3, SPAG9, ORMDL3, CDK6, LXN, SFRS1, LRRC59, ATP5G1, PIGW, BSPRY, MRPS23, PDCL, CALCOCO2, UBE2Z, ERBB2, STRBP, RPL7A, RABGAP1, CASC3, MCPH1, …	381	6219	15857	1.20461
GOTERM_CC_ALL	GO:0005576~extracellular region	51	0.1074	0.00131611	DEFA1, DEFA3, TNFSF8, LECT1, FASLG, CSF3, COL1A2, NXPH3, C5, CPB2, CCL14, DEFA5, TNR, IL12A, PON3, GSN, DEFB103A, ANGPTL1, PON1, LAMC2, IGFBP4, MMP28, SGCE, ANGPT2, CCL20, TFPI2, CCL13, TNC, TNFSF18, ERBB2, SGCA, CCL5, CCL1, TAC1, GIP, SERPINC1, CCL2, SPACA3, PAPPA, TNN, TNFSF4, PON2, COL4A4, CHAD, TNFSF15, OLFM4, TNFSF11, POSTN, ZPBP2, UGCG, GNGT2, FREM2,	381	1350	15857	1.57229
GOTERM_CC_ALL	GO:0005615~extracellular space	24	0.0505	0.00369705	CCL2, PAPPA, CCL14, TNFSF8, LECT1, ANGPT2, TNFSF4, CCL20, FASLG, TNR, IL12A, CCL13, CSF3, TNFSF15, TNFSF18, ANGPTL1, PON1, CCL5, TNFSF11, C5, CPB2, CCL1, TAC1, UGCG,	381	521	15857	1.91721
GOTERM_CC_ALL	GO:0015630~microtubule cytoskeleton	20	0.0421	0.00435168	CDK5RAP2, DYNC1I1, CCNA1, CEP350, CDC6, DYNLL2, CEP110, KIF5C, RB1, CKAP2, KIF2B, KIAA0368, KIF12, TUBD1, AKAP9, DNM3, RABGAP1, MCPH1, C1orf49, APPBP2,	381	406	15857	2.05022
GOTERM_CC_ALL	GO:0044444~cytoplasmic part	111	0.2337	0.00704078	MRPS31, PTGS1, CEP350, PCTP, RNASEL, ATAD4, SLC25A30, ATP6V1G1, STARD3, MMD, HDHD3, TMEM49, PSMB3, MRRF, ATP7B, ACN9, ABL2, MRPL27, GLT25D2, CEP110, SLC25A13, MRPL10, PSMD3, SPAG9, ORMDL3, LRRC59, ATP5G1, PIGW, MRPS23, CALCOCO2, RPL7A, RABGAP1, MCPH1, MRPS14, AGPAT5, SUCLA2, AP2B1, RFFL, SHFM1, PDK2, DNER, ALG5, KIAA0368, BET1, COX11, SLC35B1, LCP1, NDUFA8, PEX1, DYNC1I1, AKAP1, STOM, RPL23, DARS…	381	3717	15857	1.24287
GOTERM_CC_ALL	GO:0005770~late endosome	6	0.0126	0.00860805	VPS36, RAB14, KIAA0368, STARD3, ATP7B, MMD,	381	53	15857	4.71163
GOTERM_CC_ALL	GO:0005813~centrosome	9	0.0189	0.0119729	KIF2B, CDK5RAP2, KIAA0368, TUBD1, CEP350, AKAP9, RABGAP1, MCPH1, CEP110,	381	128	15857	2.92637
GOTERM_CC_ALL	GO:0005798~Golgi-associated vesicle	6	0.0126	0.0163162	COPZ2, AP2B1, RAB14, KIAA0368, AP1GBP1, CLTC,	381	62	15857	4.02769
GOTERM_CC_ALL	GO:0044424~intracellular part	258	0.5432	0.0194692	SAMD9, MRPS31, PTGS1, PCTP, RNASEL, SLC25A30, ATP6V1G1, ZNF652, COL1A2, RFWD2, HDHD3, PSMB3, MRRF, ZBTB26, NEK3, ABL2, MRPL27, GLT25D2, CEP110, DFNB31, SETDB2, MRPL10, PSMD3, SPAG9, ORMDL3, CDK6, LXN, NLE1, LRRC59, ZNF618, ATP5G1, BSPRY, UBE2Z, STRBP, RPL7A, MCPH1, SNF8, MRPS14, AGPAT5, TBX4, RFXAP, MSI2, RFFL, SHFM1, PDK2, MAB21L1, DNER, HOXB1, HOXB7, GTF2F2, ALG5, LHX1, KIAA0368, TRIM32, COX11,…	381	9906	15857	1.08397
GOTERM_CC_ALL	GO:0005815~microtubule organizing center	9	0.0189	0.0203519	KIF2B, CDK5RAP2, KIAA0368, TUBD1, CEP350, AKAP9, RABGAP1, MCPH1, CEP110,	381	141	15857	2.65656
GOTERM_CC_ALL	GO:0005802~trans-Golgi network	4	0.0084	0.0212471	STX6, KIAA0368, NBEA, ATP7B,	381	25	15857	6.65911
GOTERM_CC_ALL	GO:0005739~mitochondrion	34	0.0716	0.0248281	NDUFA8, PHB, MRPS31, AKAP1, RNASEL, MRPS23, SLC25A30, MRM1, DARS2, HDHD3, MTRF1, BZRAP1, MRRF, RSAD1, ATP7B, MRPS14, AGPAT5, ACN9, SUCLA2, SEPT4, GLUL, MRPL45, MRPL27, STARD13, SLC25A15, PDK2, PDK4, SLC25A13, MRPL10, PTRH2, OLFM4, COX11, CLTC, ATP5G1,	381	963	15857	1.46943
GOTERM_CC_ALL	GO:0005829~cytosol	21	0.0442	0.0279089	ABL2, PEX1, CCNA1, PCTP, RGS3, ATAD4, SHFM1, GSN, NCF2, PSMD3, KIAA0368, RAB14, PSMD5, NBEA, RPL7A, RABGAP1, RPL19, LCP1, PSMB3, PRDX6, NUFIP1,	381	524	15857	1.66795
GOTERM_CC_ALL	GO:0005604~basement membrane	6	0.0126	0.0306752	TNC, SGCA, LECT1, LAMC2, COL4A4, SGCE,	381	73	15857	3.42077
GOTERM_CC_ALL	GO:0030863~cortical cytoskeleton	4	0.0084	0.0314761	TRPC4, PPP1R9B, PPP1R9A, LASP1,	381	29	15857	5.74061
GOTERM_CC_ALL	GO:0005578~proteinaceous extracellular matrix	15	0.0316	0.038627	TNN, LECT1, COL4A4, TNR, TFPI2, CHAD, TNC, COL1A2, OLFM4, SGCA, LAMC2, POSTN, MMP28, FREM2, SGCE,	381	344	15857	1.8148
GOTERM_CC_ALL	GO:0043229~intracellular organelle	217	0.4568	0.0394053	MRPS31, PTGS1, RNASEL, SLC25A30, ATP6V1G1, ZNF652, RFWD2, HDHD3, PSMB3, MRRF, ZBTB26, NEK3, ABL2, MRPL27, GLT25D2, CEP110, SETDB2, MRPL10, SPAG9, ORMDL3, CDK6, NLE1, LRRC59, ZNF618, ATP5G1, UBE2Z, STRBP, RPL7A, MCPH1, SNF8, MRPS14, AGPAT5, TBX4, RFXAP, RFFL, SHFM1, PDK2, MAB21L1, DNER, HOXB1, HOXB7, GTF2F2, ALG5, LHX1, KIAA0368, TRIM32, COX11, SLC35B1, SUPT4H1, DHX9, HLF, STOM, RPL23, NEUROD2, BZ…	381	8288	15857	1.0897
GOTERM_CC_ALL	GO:0043226~organelle	217	0.4568	0.0402598	MRPS31, PTGS1, RNASEL, SLC25A30, ATP6V1G1, ZNF652, RFWD2, HDHD3, PSMB3, MRRF, ZBTB26, NEK3, ABL2, MRPL27, GLT25D2, CEP110, SETDB2, MRPL10, SPAG9, ORMDL3, CDK6, NLE1, LRRC59, ZNF618, ATP5G1, UBE2Z, STRBP, RPL7A, MCPH1, SNF8, MRPS14, AGPAT5, TBX4, RFXAP, RFFL, SHFM1, PDK2, MAB21L1, DNER, HOXB1, HOXB7, GTF2F2, ALG5, LHX1, KIAA0368, TRIM32, COX11, SLC35B1, SUPT4H1, DHX9, HLF, STOM, RPL23, NEUROD2, BZ…	381	8292	15857	1.08917
GOTERM_CC_ALL	GO:0000502~proteasome complex (sensu Eukaryota)	5	0.0105	0.0425367	PSMD3, KIAA0368, PSMD5, PSMB3, SHFM1,	381	55	15857	3.78358
GOTERM_CC_ALL	GO:0030140~trans-Golgi network transport vesicle	4	0.0084	0.0438421	AP2B1, RAB14, AP1GBP1, CLTC,	381	33	15857	5.04478
GOTERM_CC_ALL	GO:0031012~extracellular matrix	15	0.0316	0.0439483	TNN, LECT1, COL4A4, TNR, TFPI2, CHAD, TNC, COL1A2, OLFM4, SGCA, LAMC2, POSTN, MMP28, FREM2, SGCE,	381	350	15857	1.78369
GOTERM_CC_ALL	GO:0005764~lysosome	10	0.0211	0.0507795	MPO, SPACA3, NCF2, VPS36, SPAG9, RAB14, AGA, ATP6V1G1, PRDX6, MMD,	381	199	15857	2.09143
GOTERM_CC_ALL	GO:0000323~lytic vacuole	10	0.0211	0.0507795	MPO, SPACA3, NCF2, VPS36, SPAG9, RAB14, AGA, ATP6V1G1, PRDX6, MMD,	381	199	15857	2.09143
GOTERM_CC_ALL	GO:0016604~nuclear body	7	0.0147	0.0525881	RB1, WBP4, PRPF4, PCGF2, RFWD2, SFRS1, COIL,	381	112	15857	2.60121
GOTERM_CC_ALL	GO:0044420~extracellular matrix part	7	0.0147	0.0563942	TNC, COL1A2, SGCA, LECT1, LAMC2, COL4A4, SGCE,	381	114	15857	2.55558
GOTERM_CC_ALL	GO:0043231~intracellular membrane-bound organelle	189	0.3979	0.0569588	MRPS31, PTGS1, CEP350, RNASEL, ATAD4, SLC25A30, STARD3, ATP6V1G1, MMD, ZNF652, ROD1, RFWD2, HDHD3, TMEM49, PSMB3, IGF2BP1, MRRF, ZBTB26, ATP7B, ACN9, NEK3, MRPL27, GLT25D2, LHX4, CEP110, KPNA4, SETDB2, SLC25A13, ORC4L, MRPL10, SPAG9, ORMDL3, CDK6, RARA, SFRS1, NLE1, LRRC59, ZNF618, THRA, ATP5G1, PIGW, LIG3, ZBTB37, MRPS23, NR1D1, CALCOCO2, UBE2Z, BCAS3, STRBP, YPEL2, CASC3, AGPAT5, MRPS14, SNF8, …	381	7191	15857	1.09388
GOTERM_CC_ALL	GO:0043227~membrane-bound organelle	189	0.3979	0.0578237	MRPS31, PTGS1, CEP350, RNASEL, ATAD4, SLC25A30, STARD3, ATP6V1G1, MMD, ZNF652, ROD1, RFWD2, HDHD3, TMEM49, PSMB3, IGF2BP1, MRRF, ZBTB26, ATP7B, ACN9, NEK3, MRPL27, GLT25D2, LHX4, CEP110, KPNA4, SETDB2, SLC25A13, ORC4L, MRPL10, SPAG9, ORMDL3, CDK6, RARA, SFRS1, NLE1, LRRC59, ZNF618, THRA, ATP5G1, PIGW, LIG3, ZBTB37, MRPS23, NR1D1, CALCOCO2, UBE2Z, BCAS3, STRBP, YPEL2, CASC3, AGPAT5, MRPS14, SNF8, …	381	7194	15857	1.09342
GOTERM_CC_ALL	GO:0030133~transport vesicle	5	0.0105	0.0612233	AP2B1, RAB14, KIAA0368, AP1GBP1, CLTC,	381	62	15857	3.35641
GOTERM_CC_ALL	GO:0005622~intracellular	268	0.5642	0.0631639	SAMD9, MRPS31, PTGS1, PCTP, RNASEL, SLC25A30, ATP6V1G1, ZNF652, PAPPA2, COL1A2, RFWD2, HDHD3, PSMB3, MRRF, ZBTB26, NEK3, ABL2, MRPL27, GLT25D2, CEP110, DFNB31, SETDB2, MRPL10, RASL10B, PSMD3, SPAG9, ORMDL3, CDK6, LXN, NLE1, LRRC59, ZNF618, ATP5G1, BSPRY, UBE2Z, STRBP, RPL7A, MCPH1, SNF8, MRPS14, AGPAT5, ZNHIT3, TBX4, RFXAP, MSI2, RFFL, SHFM1, PDK2, MAB21L1, DNER, HOXB1, HOXB7, GTF2F2, ALG5, LHX1,…	381	10544	15857	1.05785
GOTERM_CC_ALL	GO:0030864~cortical actin cytoskeleton	3	0.0063	0.0749253	PPP1R9B, PPP1R9A, LASP1,	381	19	15857	6.57149
GOTERM_CC_ALL	GO:0005875~microtubule associated complex	7	0.0147	0.0755248	KIF2B, DYNC1I1, KIF12, RABGAP1, DYNLL2, APPBP2, KIF5C,	381	123	15857	2.36859
GOTERM_CC_ALL	GO:0005856~cytoskeleton	36	0.0758	0.0785552	TRPC4, DYNC1I1, CCNA1, CEP350, STOM, KRIT1, CALCOCO2, KIF5C, SGCA, TUBD1, DNM3, RABGAP1, KLHL20, MCPH1, APPBP2, GAS2L2, ABL2, ARPC5, CDK5RAP2, TNS4, PPP1R9A, CDC6, CEP110, DYNLL2, GSN, CKAP2, RB1, KIF2B, KIAA0368, KIF12, PPP1R9B, AKAP9, LCP1, C1orf49, LASP1, SGCE,	381	1141	15857	1.31315
GOTERM_CC_ALL	GO:0032991~macromolecular complex	74	0.1558	0.0830962	NDUFA8, TLR4, GNG11, MRPS31, PRPF4, DYNC1I1, MR1, ATAD4, RPL23, ATP6V1G1, KIF5C, WBP4, UTP14C, C5, RPL19, PSMB3, CACNB1, APPBP2, NUFIP1, SMARCE1, ABL2, TADA2L, MRPL45, ITGA3, MRPL27, PPM1D, KPNA4, IL12A, MED4, RB1, MRPL10, PSMD3, CACNA1G, LAMC2, CDK6, PPP1R9B, SFRS1, ATP5G1, SGCE, NARG1L, GNG10, EXOSC8, TRPC4, SUGT1, KPNA3, MRPS23, PCGF2, HRB, RFC3, SPCS3, SGCA, PSMD5, RPL7A, KPNB1, DNM3, RABGAP1…	381	2609	15857	1.18047
GOTERM_CC_ALL	GO:0044448~cell cortex part	4	0.0084	0.0834844	TRPC4, PPP1R9B, PPP1R9A, LASP1,	381	43	15857	3.87157
GOTERM_CC_ALL	GO:0005773~vacuole	10	0.0211	0.0874432	MPO, SPACA3, NCF2, VPS36, SPAG9, RAB14, AGA, ATP6V1G1, PRDX6, MMD,	381	222	15857	1.87475
GOTERM_CC_ALL	GO:0030130~clathrin coat of trans-Golgi network vesicle	3	0.0063	0.0966358	AP2B1, AP1GBP1, CLTC,	381	22	15857	5.67538
GOTERM_MF_ALL	GO:0005164~tumor necrosis factor receptor binding	6	0.0126	0.000130743	TNFSF15, TNFSF8, TNFSF18, TNFSF11, TNFSF4, FASLG,	380	23	16968	11.6485
GOTERM_MF_ALL	GO:0032813~tumor necrosis factor receptor superfamily binding	6	0.0126	0.000162142	TNFSF15, TNFSF8, TNFSF18, TNFSF11, TNFSF4, FASLG,	380	24	16968	11.1632
GOTERM_MF_ALL	GO:0005515~protein binding	196	0.4126	0.000240269	TNFSF8, SNX30, FASLG, RNF183, ATP6V1G1, ZNF652, COL1A2, RFWD2, PSMB3, ZBTB26, NEK3, ABL2, ITGA3, CDK5RAP3, CEP110, DFNB31, CCR7, PSMD3, SPAG9, CDK6, LXN, LRRC59, ZNF618, GNG10, ANGPT2, CCL13, WFIKKN2, ZNHIT3, TNN, TBX4, RFXAP, RFFL, CACNA1E, SHFM1, CHAD, PDK2, DNER, HOXB1, HOXB7, LRRC46, TRIM32, PCDH9, ACCN1, POSTN, SUPT4H1, KCTD4, DHX9, TLR4, MYCBPAP, HLF, RC3H1, CSF3, STXBP4, GRB7, BZRAP1, HTR2…	380	7212	16968	1.21352
GOTERM_MF_ALL	GO:0005125~cytokine activity	17	0.0358	0.000249411	CCL2, CCL14, TNFSF8, TNFSF4, CCL20, FASLG, IL12A, CCL13, CSF3, TNFSF15, ERBB2, TNFSF18, CCL5, TNFSF11, C5, CCL1, VEGFC,	380	259	16968	2.93087
GOTERM_MF_ALL	GO:0008009~chemokine activity	7	0.0147	0.000920128	CCL2, CCL13, CCL14, CCL5, CCL20, C5, CCL1,	380	51	16968	6.12879
GOTERM_MF_ALL	GO:0042379~chemokine receptor binding	7	0.0147	0.00102088	CCL2, CCL13, CCL14, CCL5, CCL20, C5, CCL1,	380	52	16968	6.01093
GOTERM_MF_ALL	GO:0004064~arylesterase activity	3	0.0063	0.00147074	PON1, PON2, PON3,	380	3	16968	44.6526
GOTERM_MF_ALL	GO:0005102~receptor binding	31	0.0653	0.00481754	TNFSF8, ANGPT2, CCL20, FASLG, TNC, CCL13, CSF3, TNFSF18, ERBB2, CCL5, BZRAP1, NXPH3, C5, CCL1, GIP, VEGFC, CCL2, CCL14, ZNHIT3, TNN, TNFSF4, TNR, IL12A, DNER, MED4, RB1, TNFSF15, ANGPTL1, TNFSF11, AKAP9, IRS1,	380	811	16968	1.70682
GOTERM_MF_ALL	GO:0008565~protein transporter activity	9	0.0189	0.00552158	STX6, AP2B1, MRPL45, KPNB1, COG3, KPNA3, CCT6B, KPNA4, CLTC,	380	120	16968	3.34895
GOTERM_MF_ALL	GO:0001664~G-protein-coupled receptor binding	7	0.0147	0.00844034	CCL2, CCL13, CCL14, CCL5, CCL20, C5, CCL1,	380	79	16968	3.95656
GOTERM_MF_ALL	GO:0005488~binding	312	0.6568	0.00849295	TDRD3, TNFSF8, SNX30, PTGS1, DHX40, PCTP, RNASEL, FASLG, RNF183, SLC25A30, ATP6V1G1, PNPO, ZNF652, PAPPA2, COL1A2, RFWD2, CPB2, PSMB3, SLC31A1, ZBTB26, CYP51A1, NEK3, ABL2, ITGA3, CDK5RAP3, CEP110, DFNB31, CCR7, SETDB2, RASL10B, PSMD3, SPAG9, CDK6, LXN, LRRC59, MMP28, ZNF618, ATP5G1, GNG10, BSPRY, CA4, ABCC3, ANGPT2, UNC45B, CCL13, STRBP, RPL7A, WFIKKN2, ZNHIT3, TNN, SVEP1, TBX4, RFXAP, HSDL2, MS…	380	13054	16968	1.06723
GOTERM_MF_ALL	GO:0005375~copper ion transmembrane transporter activity	3	0.0063	0.0127451	SLC31A2, SLC31A1, ATP7B,	380	8	16968	16.7447
GOTERM_MF_ALL	GO:0004601~peroxidase activity	5	0.0105	0.0140551	MPO, PTGS1, EPX, PRDX6, LPO,	380	42	16968	5.31579
GOTERM_MF_ALL	GO:0016684~oxidoreductase activity, acting on peroxide as acceptor	5	0.0105	0.0140551	MPO, PTGS1, EPX, PRDX6, LPO,	380	42	16968	5.31579
GOTERM_MF_ALL	GO:0043565~sequence-specific DNA binding	22	0.0463	0.0171575	NFE2L1, HOXB5, DLX3, HLF, ELF1, DLX5, GATAD1, LHX4, NR1D1, HOXB3, HOXB13, LHX6, HOXB1, ORC4L, HOXB7, FOXO1A, LHX1, DLX6, HOXB2, RARA, HOXB6, THRA,	380	568	16968	1.7295
GOTERM_MF_ALL	GO:0008094~DNA-dependent ATPase activity	5	0.0105	0.0342308	DHX9, RAD51C, RFC3, RAD51L3, BRIP1,	380	55	16968	4.05933
GOTERM_MF_ALL	GO:0016209~antioxidant activity	5	0.0105	0.036238	MPO, PTGS1, EPX, PRDX6, LPO,	380	56	16968	3.98684
GOTERM_MF_ALL	GO:0003700~transcription factor activity	33	0.0695	0.0387316	MYST2, HOXB5, HLF, ELF1, DLX5, NR1D1, HOXB3, NEUROD2, PCGF2, DLX6, TSC22D1, HOXB2, NFE2L1, TADA2L, DLX3, TBX4, RFXAP, GATAD1, LHX4, HOXB13, LHX6, RB1, HOXB1, FOXO1A, HOXB7, LHX1, RARA, HOXB6, SUPT4H1, THRA, ZFP37, AATF, ZNF483,	380	1034	16968	1.42508
GOTERM_MF_ALL	GO:0004063~aryldialkylphosphatase activity	2	0.0042	0.0441747	PON1, PON2,	380	2	16968	44.6526
GOTERM_MF_ALL	GO:0003777~microtubule motor activity	6	0.0126	0.0471465	KIF2B, DYNC1I1, KIF12, DYNLL2, APPBP2, KIF5C,	380	88	16968	3.0445
GOTERM_MF_ALL	GO:0017111~nucleoside-triphosphatase activity	22	0.0463	0.0498528	DHX9, SEPT4, GNG10, GNG11, PEX1, DHX40, DDX52, ABCC3, ATAD4, CDC6, ATP6V1G1, BRIP1, ORC4L, GNAT1, RAB14, RAD51C, RFC3, RAD51L3, DNM3, GNGT2, ATP5G1, ATP7B,	380	637	16968	1.54216
GOTERM_MF_ALL	GO:0046914~transition metal ion binding	78	0.1642	0.0580048	MYST2, WDFY2, PTGS1, RC3H1, RNASEL, RNF183, APOBEC4, ZNF652, WBP4, PAPPA2, DGKH, RFWD2, ALAD, NEIL3, CPB2, SLC31A1, ZBTB26, CYP51A1, RSAD1, ATP7B, NUFIP1, ABL2, TADA2L, SLC31A2, ACACA, PPM1D, EPX, LHX4, SETDB2, RNF43, RARA, CCDC16, THRA, MMP28, ZFP37, ZNF618, LASP1, CDADC1, CA10, LIG3, BSPRY, CA4, PEX12, STAC2, ZBTB37, TRIM59, NR1D1, LPO, ERBB2, PCGF2, HRB, SP6, KPNB1, ANKIB1, PHF11, ACVR2A, MPO,…	380	2908	16968	1.1977
GOTERM_MF_ALL	GO:0004091~carboxylesterase activity	7	0.0147	0.0654379	CALCR, PTRH2, PON1, ESD, PON2, PRDX6, PON3,	380	127	16968	2.46117
GOTERM_MF_ALL	GO:0042808~neuronal Cdc2-like kinase binding	2	0.0042	0.0655267	CDK5RAP2, CDK5RAP3,	380	3	16968	29.7684
GOTERM_MF_ALL	GO:0016462~pyrophosphatase activity	22	0.0463	0.0702327	DHX9, SEPT4, GNG10, GNG11, PEX1, DHX40, DDX52, ABCC3, ATAD4, CDC6, ATP6V1G1, BRIP1, ORC4L, GNAT1, RAB14, RAD51C, RFC3, RAD51L3, DNM3, GNGT2, ATP5G1, ATP7B,	380	665	16968	1.47723
GOTERM_MF_ALL	GO:0016818~hydrolase activity, acting on acid anhydrides, in phosphorus-containing anhydrides	22	0.0463	0.0740902	DHX9, SEPT4, GNG10, GNG11, PEX1, DHX40, DDX52, ABCC3, ATAD4, CDC6, ATP6V1G1, BRIP1, ORC4L, GNAT1, RAB14, RAD51C, RFC3, RAD51L3, DNM3, GNGT2, ATP5G1, ATP7B,	380	669	16968	1.4684
GOTERM_MF_ALL	GO:0042623~ATPase activity, coupled	12	0.0253	0.0773436	DHX9, PEX1, DHX40, DDX52, RAD51C, RFC3, ABCC3, RAD51L3, ATP6V1G1, ATP5G1, ATP7B, BRIP1,	380	302	16968	1.77428
GOTERM_MF_ALL	GO:0016817~hydrolase activity, acting on acid anhydrides	22	0.0463	0.0818654	DHX9, SEPT4, GNG10, GNG11, PEX1, DHX40, DDX52, ABCC3, ATAD4, CDC6, ATP6V1G1, BRIP1, ORC4L, GNAT1, RAB14, RAD51C, RFC3, RAD51L3, DNM3, GNGT2, ATP5G1, ATP7B,	380	677	16968	1.45105
GOTERM_MF_ALL	GO:0004740~pyruvate dehydrogenase (acetyl-transferring) kinase activity	2	0.0042	0.0864029	PDK2, PDK4,	380	4	16968	22.3263
GOTERM_MF_ALL	GO:0030528~transcription regulator activity	43	0.0905	0.0951043	MYST2, HOXB5, PHB, HLF, TOB1, ELF1, DLX5, NR1D1, HOXB3, PCGF2, NEUROD2, DLX6, TSC22D1, HOXB2, CRKRS, SNF8, NFE2L1, SMARCE1, TADA2L, DLX3, TBX4, RFXAP, SP2, GATAD1, LHX4, CEP110, HOXB13, LHX6, MED4, RB1, HOXB1, FOXO1A, HOXB7, GTF2F2, LHX1, TRIM32, RARA, HOXB6, SUPT4H1, THRA, ZFP37, AATF, ZNF483,	380	1534	16968	1.25167
KEGG_PATHWAY	hsa04060:Cytokine-cytokine receptor interaction	18	0.0379	0.000436576	CCL2, ACVR2A, CCL14, TNFSF8, TNFSF4, CCL20, FASLG, IL12A, CCR7, CCL13, CSF3, TNFSF15, TNFSF18, NGFR, CCL5, TNFSF11, CCL1, VEGFC,	115	256	4214	2.57649
KEGG_PATHWAY	hsa00940:Phenylpropanoid biosynthesis	4	0.0084	0.000623546	MPO, EPX, PRDX6, LPO,	115	7	4214	20.9391
KEGG_PATHWAY	hsa00680:Methane metabolism	4	0.0084	0.00201428	MPO, EPX, PRDX6, LPO,	115	10	4214	14.6574
KEGG_PATHWAY	hsa04512:ECM-receptor interaction	9	0.0189	0.00237591	TNC, TNN, COL1A2, ITGA3, LAMC2, FNDC3A, COL4A4, TNR, CHAD,	115	88	4214	3.74763
KEGG_PATHWAY	hsa00360:Phenylalanine metabolism	4	0.0084	0.0460841	MPO, EPX, PRDX6, LPO,	115	30	4214	4.8858
KEGG_PATHWAY	hsa00363:Bisphenol A degradation	3	0.0063	0.0534093	PON1, PON2, PON3,	115	14	4214	7.85217
KEGG_PATHWAY	hsa05222:Small cell lung cancer	6	0.0126	0.0852793	RB1, ITGA3, LAMC2, CDK6, TRAF1, COL4A4,	115	87	4214	2.52714
KEGG_PATHWAY	hsa04510:Focal adhesion	10	0.0211	0.088039	TNC, ERBB2, TNN, COL1A2, ITGA3, LAMC2, COL4A4, TNR, CHAD, VEGFC,	115	199	4214	1.84138
